# Supplementary material
Source: PubMed Central journal article supplement (PMC3131651)
Supplement: supp_77_12_4066__1.pdf [file supp_77_12_4066__1.pdf]

**Supplementary Information**

- Figures S1-S4
- Tables S1-S7

**Fig. S1: Tiers of abundance**

Range of relative abundance across orders of magnitude for OTU detected in deep sequencing read datasets expressed as “tiers of abundance”: Tier 1=>1%, Tier 2=0.1-0.99%, Tier 3=0.01-0.099%, Tier 4=<0.01%. Only a small proportion of OTU are detected at >1% of total reads (Tier 1), with most detected at <0.1% (Tiers 3/4) (A). Inverse relationship observed between OTU frequency and read frequency, with few OTU but most reads in Tier 1 and vice versa (B). Proportion of individuals in study group colonized by each OTU (C). Median and range for each OTU distribution across all individuals in study group, showing low median values (<1%) for all OTU and range across orders of magnitude (D).

**Fig. S2: Richness, diversity and phylotype abundance by HIV serostatus**

Chao1 richness (A) and Simpson's diversity index (B) by HIV serostatus as calculated using mothur. Relative abundance of phylum and order-level phylotypes by HIV serostatus (C). Boxplots were created and p values calculated based on non-parametric significance tests (wilcox.test) using R statistical software (v.2.11.0).

**Fig. S3: Richness, diversity and phylotype abundance by mBV status**

Chao1 richness (A) and Simpson's diversity index (B) by mBV status as calculated using mothur. Relative abundance of phylum and order-level phylotypes by mBV status (C). Boxplots were created and p values calculated based on non-parametric significance tests (wilcox.test) using R statistical software (v.2.11.0).

**Fig. S4: Heat-map and hierarchical clustering of study sub-groups and OTU**

Individual samples were collapsed into 10 groups (HESN/BV+, HESN/mBVI, HESN/BV-, HIV-N/BV+, HIV-N/mBVI, HIV-N/BV-, HIV+/BV+, HIV+/mBVI, HIV+/mBV-, HIV+/Outlier) and heat-map generated using Genespring software based on OTU observed in at least 25% of the study group. Hierarchical clustering of groups and OTU was generated using Genespring software.

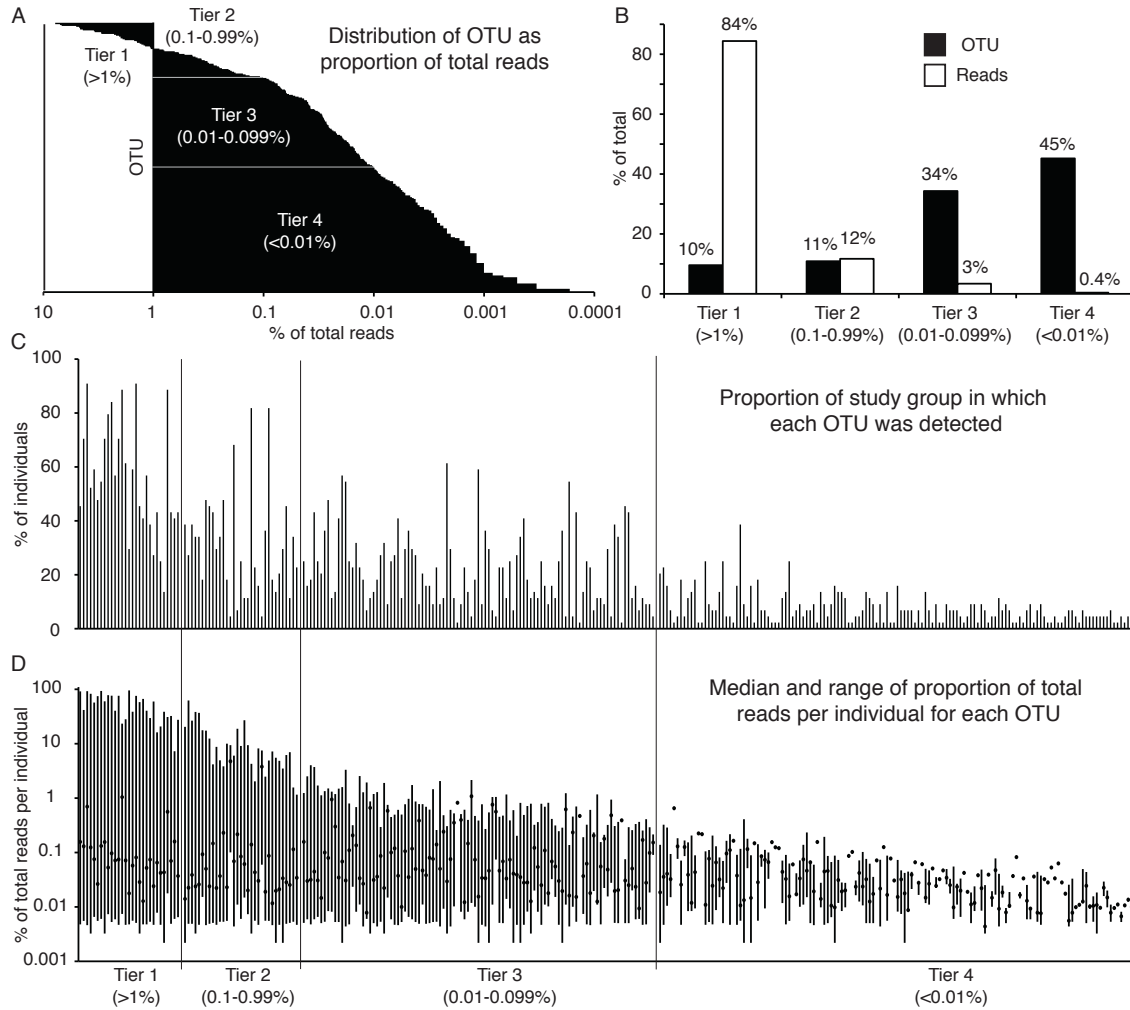

**Fig. S1: Tiers of abundance**

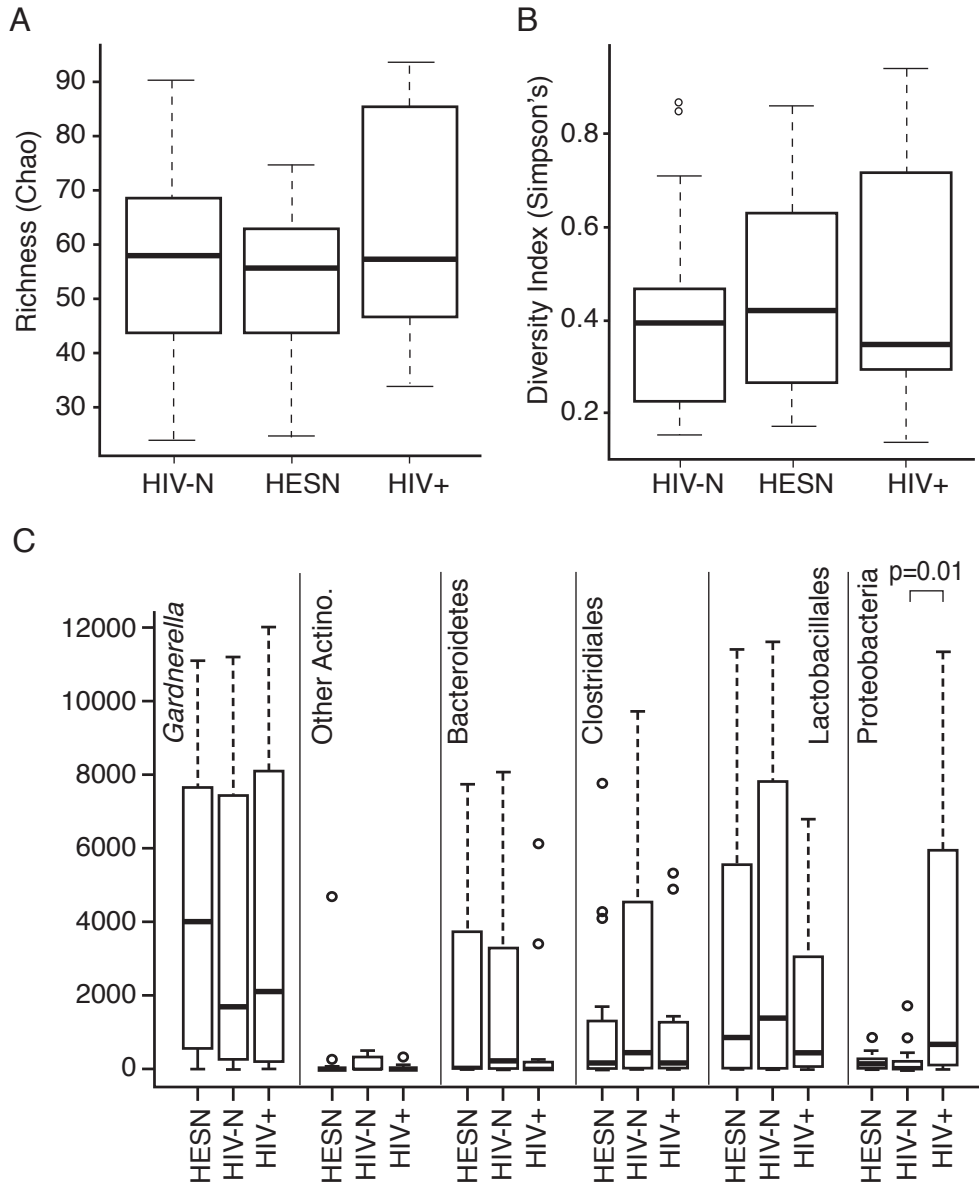

**Fig. S2: Richness, diversity and phylotype abundance by HIV serostatus**

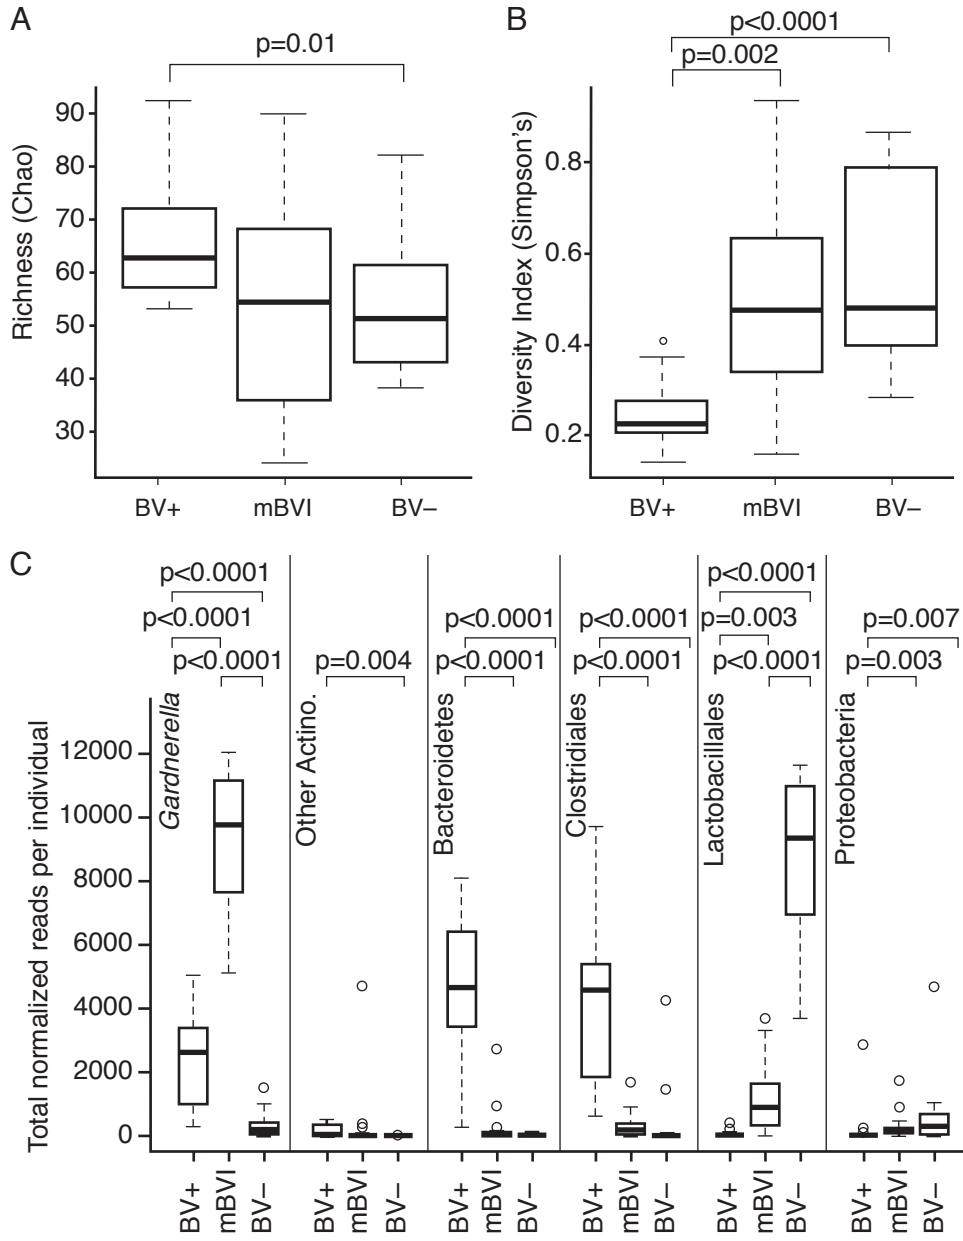

**Fig. S3: Richness, diversity and phylotype abundance by molecular BV status**

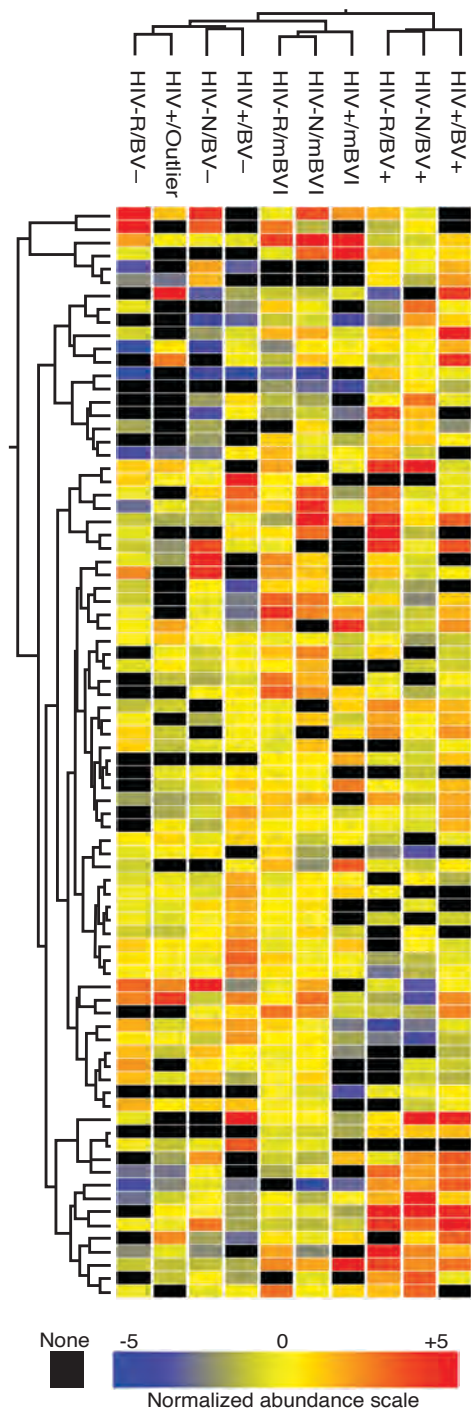

**Fig. S4: Heat-map and hierarchical clustering of study sub-groups and OTU**

Table S1: Nearest cpnDB neighbours and relative abundance of deep sequencing OTU (ND), library clones (NC) and isolates (N)

| Cluster <sup>1</sup> | Branch <sup>2</sup> | Label <sup>3</sup> | Nearest Neighbour <sup>4</sup>          | %ID  | Isolates | Clones    | % of total clones | Reads      | % of total reads |
|----------------------|---------------------|--------------------|-----------------------------------------|------|----------|-----------|-------------------|------------|------------------|
|                      | 1                   | NC032              | <i>Gardnerella vaginalis</i> ATCC 14018 | 90.9 | 0        | 1         | 0.013986          | 0          | 0                |
|                      | 2                   | NC172              | <i>Gardnerella vaginalis</i> ATCC 14018 | 88.4 | 0        | 3         | 0.041958          | 0          | 0                |
|                      | 3                   | NC034              | <i>Gardnerella vaginalis</i> ATCC 14018 | 89.6 | 0        | 2         | 0.027972          | 0          | 0                |
|                      | 4                   | ND631              | <i>Gardnerella vaginalis</i> ATCC 14018 | 86.5 | 0        | 0         | 0                 | 6          | 0.0009962        |
|                      | 5                   | NC028              | <i>Gardnerella vaginalis</i> ATCC 14018 | 89.2 | 0        | 13        | 0.1818182         | 207        | 0.0343681        |
|                      | 6                   | ND717              | <i>Gardnerella vaginalis</i> ATCC 14018 | 88.5 | 0        | 0         | 0                 | 55         | 0.0091316        |
|                      | 7                   | NC042              | <i>Gardnerella vaginalis</i> ATCC 14018 | 88.6 | 0        | 2         | 0.027972          | 0          | 0                |
|                      | 8                   | ND578              | <i>Gardnerella vaginalis</i> ATCC 14018 | 86.5 | 0        | 0         | 0                 | 7          | 0.0011622        |
|                      | 9                   | NC031              | <i>Gardnerella vaginalis</i> ATCC 14018 | 89.5 | 0        | 1         | 0.013986          | 0          | 0                |
|                      | 10                  | NC177              | <i>Gardnerella vaginalis</i> ATCC 14018 | 88.9 | 0        | 2         | 0.027972          | 0          | 0                |
|                      | 11                  | NC179              | <i>Gardnerella vaginalis</i> ATCC 14018 | 91.6 | 0        | 2         | 0.027972          | 0          | 0                |
|                      | 12                  | NC180              | <i>Gardnerella vaginalis</i> ATCC 14018 | 90.2 | 0        | 2         | 0.027972          | 0          | 0                |
|                      | 13                  | ND071              | <i>Gardnerella vaginalis</i> ATCC 14018 | 87.5 | 0        | 0         | 0                 | 528        | 0.0876637        |
|                      | 14                  | ND624              | <i>Gardnerella vaginalis</i> ATCC 14018 | 87   | 0        | 0         | 0                 | 6          | 0.0009962        |
| <b>1</b>             |                     |                    |                                         |      |          | <b>28</b> | <b>0.3916084</b>  | <b>809</b> | <b>0.134318</b>  |
|                      | 15                  | ND528              | <i>Gardnerella vaginalis</i> ATCC 14018 | 86.5 | 0        | 0         | 0                 | 17         | 0.0028225        |
|                      | 16                  | ND035              | <i>Gardnerella vaginalis</i> ATCC 14018 | 87.5 | 0        | 0         | 0                 | 18         | 0.0029885        |
|                      | 17                  | ND454              | <i>Gardnerella vaginalis</i> ATCC 14018 | 86.6 | 0        | 0         | 0                 | 12         | 0.0019924        |
|                      | 18                  | NC186              | <i>Gardnerella vaginalis</i> ATCC 14018 | 90.2 | 0        | 5         | 0.0699301         | 28175      | 4.6778858        |
|                      | 19                  | NC138              | <i>Gardnerella vaginalis</i> ATCC 14018 | 89.2 | 0        | 47        | 0.6573427         | 0          | 0                |
|                      | 20                  | ND753              | <i>Gardnerella vaginalis</i> ATCC 14018 | 86.5 | 0        | 0         | 0                 | 13         | 0.0021584        |
|                      | 21                  | ND844              | <i>Gardnerella vaginalis</i> ATCC 14018 | 86.5 | 0        | 0         | 0                 | 31         | 0.0051469        |
|                      | 22                  | ND554              | <i>Gardnerella vaginalis</i> ATCC 14018 | 87.5 | 0        | 0         | 0                 | 99         | 0.0164369        |
|                      | 23                  | NC143              | <i>Gardnerella vaginalis</i> ATCC 14018 | 91.1 | 0        | 2         | 0.027972          | 0          | 0                |
|                      | 24                  | ND694              | <i>Gardnerella vaginalis</i> ATCC 14018 | 86   | 0        | 0         | 0                 | 160        | 0.0265647        |

Table S1: Nearest cpnDB neighbours and relative abundance of deep sequencing OTU (ND), library clones (NC) and isolates (N)

| Cluster <sup>1</sup> | Branch <sup>2</sup> | Label <sup>3</sup> | Nearest Neighbour <sup>4</sup>          | %ID  | Isolates | Clones     | % of total clones | Reads        | % of total reads |
|----------------------|---------------------|--------------------|-----------------------------------------|------|----------|------------|-------------------|--------------|------------------|
|                      | 25                  | NC033              | <i>Gardnerella vaginalis</i> ATCC 14018 | 89.4 | 0        | 170        | 2.3776224         | 0            | 0                |
|                      | 26                  | N153               | <i>Gardnerella vaginalis</i> ATCC 14018 | 89.7 | 2        | 0          | 0                 | 0            | 0                |
| <b>2</b>             |                     |                    |                                         |      | <b>2</b> | <b>224</b> | <b>3.1328671</b>  | <b>28525</b> | <b>4.7359962</b> |
|                      | 27                  | NC176              | <i>Gardnerella vaginalis</i> ATCC 14018 | 88   | 0        | 1          | 0.013986          | 35           | 0.005811         |
|                      | 28                  | NC171              | <i>Gardnerella vaginalis</i> ATCC 14018 | 89.5 | 0        | 1          | 0.013986          | 0            | 0                |
|                      | 29                  | ND142              | <i>Gardnerella vaginalis</i> ATCC 14018 | 86.5 | 0        | 0          | 0                 | 9            | 0.0014943        |
|                      | 30                  | N144               | <i>Gardnerella vaginalis</i> ATCC 14018 | 90   | 2        | 5          | 0.0699301         | 11862        | 1.9694439        |
|                      | 31                  | ND022              | <i>Gardnerella vaginalis</i> ATCC 14018 | 88.5 | 0        | 0          | 0                 | 59           | 0.0097958        |
|                      | 32                  | ND462              | <i>Gardnerella vaginalis</i> ATCC 14018 | 91.5 | 0        | 0          | 0                 | 7            | 0.0011622        |
|                      | 33                  | NC093              | <i>Gardnerella vaginalis</i> ATCC 14018 | 92.4 | 0        | 1          | 0.013986          | 0            | 0                |
|                      | 34                  | NC182              | <i>Gardnerella vaginalis</i> ATCC 14018 | 92.4 | 0        | 1          | 0.013986          | 0            | 0                |
|                      | 35                  | ND655              | <i>Gardnerella vaginalis</i> ATCC 14018 | 89   | 0        | 0          | 0                 | 25           | 0.0041507        |
|                      | 36                  | ND725              | <i>Gardnerella vaginalis</i> ATCC 14018 | 92   | 0        | 0          | 0                 | 87           | 0.0144446        |
|                      | 37                  | ND242              | <i>Gardnerella vaginalis</i> ATCC 14018 | 88.5 | 0        | 0          | 0                 | 40           | 0.0066412        |
|                      | 38                  | ND094              | <i>Gardnerella vaginalis</i> ATCC 14018 | 88   | 0        | 0          | 0                 | 167          | 0.027727         |
|                      | 39                  | ND390              | <i>Gardnerella vaginalis</i> ATCC 14018 | 87.5 | 0        | 0          | 0                 | 9            | 0.0014943        |
|                      | 40                  | ND239              | <i>Gardnerella vaginalis</i> ATCC 14018 | 87.5 | 0        | 0          | 0                 | 178          | 0.0295533        |
|                      | 41                  | ND393              | <i>Gardnerella vaginalis</i> ATCC 14018 | 87   | 0        | 0          | 0                 | 30087        | 4.9953346        |
| <b>3</b>             |                     |                    |                                         |      | <b>2</b> | <b>9</b>   | <b>0.1258741</b>  | <b>42565</b> | <b>7.0670527</b> |
|                      | 42                  | ND535              | <i>Gardnerella vaginalis</i> ATCC 14018 | 97   | 0        | 0          | 0                 | 10           | 0.0016603        |
|                      | 43                  | N156               | <i>Gardnerella vaginalis</i> ATCC 14018 | 88.9 | 2        | 0          | 0                 | 2480         | 0.4117536        |
|                      | 44                  | NC036              | <i>Gardnerella vaginalis</i> ATCC 14018 | 88.6 | 0        | 1          | 0.013986          | 0            | 0                |
|                      | 45                  | NC174              | <i>Gardnerella vaginalis</i> ATCC 14018 | 88.2 | 0        | 1          | 0.013986          | 0            | 0                |
|                      | 46                  | ND301              | No near neighbour                       | <85  | 0        | 0          | 0                 | 89           | 0.0147766        |
|                      | 47                  | N072               | <i>Gardnerella vaginalis</i> ATCC 14018 | 88.9 | 5        | 0          | 0                 | 20818        | 3.4564056        |



Table S1: Nearest cpnDB neighbours and relative abundance of deep sequencing OTU (ND), library clones (NC) and isolates (N)

| Cluster <sup>1</sup> | Branch <sup>2</sup> | Label <sup>3</sup> | Nearest Neighbour <sup>4</sup>          | %ID  | Isolates | Clones     | % of total clones | Reads        | % of total reads |
|----------------------|---------------------|--------------------|-----------------------------------------|------|----------|------------|-------------------|--------------|------------------|
|                      | 48                  | ND457              | <i>Gardnerella vaginalis</i> ATCC 14018 | 87   | 0        | 0          | 0                 | 6            | 0.0009962        |
|                      | 49                  | NC054              | <i>Gardnerella vaginalis</i> ATCC 14018 | 89.7 | 0        | 1          | 0.013986          | 0            | 0                |
|                      | 50                  | ND733              | <i>Gardnerella vaginalis</i> ATCC 14018 | 92   | 0        | 0          | 0                 | 18           | 0.0029885        |
|                      | 51                  | ND748              | <i>Gardnerella vaginalis</i> ATCC 14018 | 90   | 0        | 0          | 0                 | 24           | 0.0039847        |
| <b>4</b>             |                     |                    |                                         |      | <b>7</b> | <b>3</b>   | <b>0.041958</b>   | <b>23445</b> | <b>3.8925655</b> |
|                      | 52                  | NC049              | <i>Gardnerella vaginalis</i> ATCC 14018 | 87.8 | 0        | 1          | 0.013986          | 0            | 0                |
|                      | 53                  | N134               | <i>Gardnerella vaginalis</i> ATCC 14018 | 88.9 | 3        | 105        | 1.4685315         | 0            | 0                |
|                      | 54                  | NC048              | <i>Gardnerella vaginalis</i> ATCC 14018 | 90.2 | 0        | 1          | 0.013986          | 0            | 0                |
|                      | 55                  | ND002              | <i>Gardnerella vaginalis</i> ATCC 14018 | 86   | 0        | 0          | 0                 | 15           | 0.0024904        |
|                      | 56                  | ND061              | <i>Gardnerella vaginalis</i> ATCC 14018 | 86.5 | 0        | 0          | 0                 | 12454        | 2.0677335        |
|                      | 57                  | NC050              | <i>Gardnerella vaginalis</i> ATCC 14018 | 94.2 | 0        | 6          | 0.0839161         | 0            | 0                |
|                      | 58                  | NC105              | <i>Gardnerella vaginalis</i> ATCC 14018 | 91.1 | 0        | 2          | 0.027972          | 0            | 0                |
|                      | 59                  | ND493              | <i>Gardnerella vaginalis</i> ATCC 14018 | 86.5 | 0        | 0          | 0                 | 7            | 0.0011622        |
|                      | 60                  | N137               | <i>Gardnerella vaginalis</i> ATCC 14018 | 89.5 | 1        | 0          | 0                 | 7433         | 1.2340985        |
|                      | 61                  | NC073              | <i>Gardnerella vaginalis</i> ATCC 14018 | 88.7 | 0        | 1          | 0.013986          | 0            | 0                |
|                      | 62                  | ND532              | <i>Gardnerella vaginalis</i> ATCC 14018 | 87.5 | 0        | 0          | 0                 | 13           | 0.0021584        |
|                      | 63                  | NC055              | <i>Gardnerella vaginalis</i> ATCC 14018 | 88.8 | 0        | 1          | 0.013986          | 0            | 0                |
|                      | 64                  | NC103              | <i>Gardnerella vaginalis</i> ATCC 14018 | 89.9 | 0        | 1          | 0.013986          | 0            | 0                |
|                      | 65                  | NC063              | <i>Gardnerella vaginalis</i> ATCC 14018 | 88.8 | 0        | 1          | 0.013986          | 0            | 0                |
|                      | 66                  | NC069              | <i>Gardnerella vaginalis</i> ATCC 14018 | 89.3 | 0        | 2          | 0.027972          | 0            | 0                |
|                      | 67                  | NC064              | <i>Gardnerella vaginalis</i> ATCC 14018 | 90.8 | 0        | 1          | 0.013986          | 0            | 0                |
|                      | 68                  | NC052              | <i>Gardnerella vaginalis</i> ATCC 14018 | 90.2 | 0        | 1          | 0.013986          | 0            | 0                |
|                      | 69                  | NC030              | <i>Gardnerella vaginalis</i> ATCC 14018 | 89.1 | 0        | 5          | 0.0699301         | 2415         | 0.4009616        |
|                      | 70                  | NC088              | <i>Gardnerella vaginalis</i> ATCC 14018 | 92   | 0        | 4          | 0.0559441         | 0            | 0                |
| <b>5</b>             |                     |                    |                                         |      | <b>4</b> | <b>132</b> | <b>1.8461538</b>  | <b>22337</b> | <b>3.7086047</b> |

Table S1: Nearest cpnDB neighbours and relative abundance of deep sequencing OTU (ND), library clones (NC) and isolates (N)

| Cluster <sup>1</sup> | Branch <sup>2</sup> | Label <sup>3</sup> | Nearest Neighbour <sup>4</sup>          | %ID  | Isolates | Clones    | % of total clones | Reads       | % of total reads |
|----------------------|---------------------|--------------------|-----------------------------------------|------|----------|-----------|-------------------|-------------|------------------|
|                      | 71                  | ND203              | <i>Gardnerella vaginalis</i> ATCC 14018 | 90   | 0        | 0         | 0                 | 52          | 0.0086335        |
|                      | 72                  | ND628              | <i>Gardnerella vaginalis</i> ATCC 14018 | 89.5 | 0        | 0         | 0                 | 7           | 0.0011622        |
|                      | 73                  | NC112              | <i>Gardnerella vaginalis</i> ATCC 14018 | 92.2 | 0        | 1         | 0.013986          | 0           | 0                |
|                      | 74                  | ND235              | <i>Gardnerella vaginalis</i> ATCC 14018 | 93   | 0        | 0         | 0                 | 28          | 0.0046488        |
|                      | 75                  | ND463              | <i>Gardnerella vaginalis</i> ATCC 14018 | 94.5 | 0        | 0         | 0                 | 6           | 0.0009962        |
|                      | 76                  | ND622              | <i>Gardnerella vaginalis</i> ATCC 14018 | 93   | 0        | 0         | 0                 | 17          | 0.0028225        |
|                      | 77                  | ND886              | <i>Gardnerella vaginalis</i> ATCC 14018 | 92   | 0        | 0         | 0                 | 24          | 0.0039847        |
|                      | 78                  | ND258              | <i>Gardnerella vaginalis</i> ATCC 14018 | 93.5 | 0        | 0         | 0                 | 172         | 0.0285571        |
|                      | 79                  | ND662              | <i>Gardnerella vaginalis</i> ATCC 14018 | 96.5 | 0        | 0         | 0                 | 288         | 0.0478165        |
|                      | 80                  | ND458              | <i>Gardnerella vaginalis</i> ATCC 14018 | 95.5 | 0        | 0         | 0                 | 7           | 0.0011622        |
|                      | 81                  | ND507              | <i>Gardnerella vaginalis</i> ATCC 14018 | 97   | 0        | 0         | 0                 | 1073        | 0.1781498        |
|                      | 82                  | NC151              | <i>Gardnerella vaginalis</i> ATCC 14018 | 94   | 0        | 13        | 0.1818182         | 0           | 0                |
|                      | 83                  | NC113              | <i>Gardnerella vaginalis</i> ATCC 14018 | 93.1 | 0        | 1         | 0.013986          | 0           | 0                |
|                      | 84                  | ND766              | <i>Gardnerella vaginalis</i> ATCC 14018 | 97.5 | 0        | 0         | 0                 | 236         | 0.039183         |
|                      | 85                  | ND067              | <i>Gardnerella vaginalis</i> ATCC 14018 | 97.5 | 0        | 0         | 0                 | 1244        | 0.2065409        |
|                      | 86                  | ND369              | <i>Gardnerella vaginalis</i> ATCC 14018 | 98.5 | 0        | 0         | 0                 | 8           | 0.0013282        |
| <b>6</b>             |                     |                    |                                         |      |          | <b>15</b> | <b>0.2097902</b>  | <b>3162</b> | <b>0.5249858</b> |
|                      | 87                  | ND234              | <i>Gardnerella vaginalis</i> ATCC 14018 | 97.5 | 0        | 0         | 0                 | 6           | 0.0009962        |
|                      | 88                  | ND404              | <i>Gardnerella vaginalis</i> ATCC 14018 | 98   | 0        | 0         | 0                 | 9174        | 1.5231562        |
|                      | 89                  | ND664              | <i>Gardnerella vaginalis</i> ATCC 14018 | 98   | 0        | 0         | 0                 | 16          | 0.0026565        |
|                      | 90                  | N164               | <i>Gardnerella vaginalis</i> ATCC 14018 | 99.1 | 1        | 0         | 0                 | 0           | 0                |
|                      | 91                  | ND231              | <i>Gardnerella vaginalis</i> ATCC 14018 | 100  | 0        | 0         | 0                 | 13011       | 2.160212         |
|                      | 92                  | ND233              | <i>Gardnerella vaginalis</i> ATCC 14018 | 98   | 0        | 0         | 0                 | 158         | 0.0262327        |
|                      | 93                  | ND316              | <i>Gardnerella vaginalis</i> ATCC 14018 | 97   | 0        | 0         | 0                 | 20713       | 3.4389725        |
|                      | 94                  | ND302              | <i>Gardnerella vaginalis</i> ATCC 14018 | 97.5 | 0        | 0         | 0                 | 422         | 0.0700645        |

Table S1: Nearest cpnDB neighbours and relative abundance of deep sequencing OTU (ND), library clones (NC) and isolates (N)

| Cluster <sup>1</sup> | Branch <sup>2</sup> | Label <sup>3</sup> | Nearest Neighbour <sup>4</sup>          | %ID  | Isolates | Clones    | % of total clones | Reads        | % of total reads |
|----------------------|---------------------|--------------------|-----------------------------------------|------|----------|-----------|-------------------|--------------|------------------|
|                      | 95                  | N165               | <i>Gardnerella vaginalis</i> ATCC 14018 | 97.3 | 1        | 0         | 0                 | 0            | 0                |
|                      | 96                  | ND642              | <i>Gardnerella vaginalis</i> ATCC 14018 | 97   | 0        | 0         | 0                 | 37           | 0.0061431        |
|                      | 97                  | NC062              | <i>Gardnerella vaginalis</i> ATCC 14018 | 94.9 | 0        | 1         | 0.013986          | 0            | 0                |
|                      | 98                  | NC097              | <i>Gardnerella vaginalis</i> ATCC 14018 | 97.6 | 0        | 8         | 0.1118881         | 0            | 0                |
|                      | 99                  | ND260              | <i>Gardnerella vaginalis</i> ATCC 14018 | 96.5 | 0        | 0         | 0                 | 7961         | 1.3217622        |
|                      | 100                 | ND243              | <i>Gardnerella vaginalis</i> ATCC 14018 | 96   | 0        | 0         | 0                 | 16           | 0.0026565        |
|                      | 101                 | ND573              | <i>Gardnerella vaginalis</i> ATCC 14018 | 96   | 0        | 0         | 0                 | 14           | 0.0023244        |
| <b>7</b>             |                     |                    |                                         |      | <b>2</b> | <b>24</b> | <b>0.3356643</b>  | <b>56178</b> | <b>9.3272146</b> |
|                      | 102                 | ND102              | No near neighbour                       | <85  | 0        | 0         | 0                 | 5005         | 0.8309785        |
|                      | 103                 | NC057              | <i>Gardnerella vaginalis</i> ATCC 14018 | 89.3 | 0        | 1         | 0.013986          | 0            | 0                |
|                      | 104                 | NC070              | <i>Gardnerella vaginalis</i> ATCC 14018 | 87.6 | 0        | 1         | 0.013986          | 0            | 0                |
|                      | 105                 | NC089              | <i>Gardnerella vaginalis</i> ATCC 14018 | 86.2 | 0        | 1         | 0.013986          | 0            | 0                |
|                      | 106                 | ND533              | <i>Gardnerella vaginalis</i> ATCC 14018 | 87.5 | 0        | 0         | 0                 | 16           | 0.0026565        |
|                      | 107                 | ND724              | <i>Gardnerella vaginalis</i> ATCC 14018 | 93.5 | 0        | 0         | 0                 | 40           | 0.0066412        |
|                      | 108                 | NC076              | <i>Gardnerella vaginalis</i> ATCC 14018 | 92.9 | 0        | 2         | 0.027972          | 0            | 0                |
|                      | 109                 | NC085              | <i>Gardnerella vaginalis</i> ATCC 14018 | 90.9 | 0        | 1         | 0.013986          | 0            | 0                |
|                      | 110                 | NC102              | <i>Gardnerella vaginalis</i> ATCC 14018 | 91.1 | 0        | 1         | 0.013986          | 0            | 0                |
|                      | 111                 | NC074              | <i>Gardnerella vaginalis</i> ATCC 14018 | 91.8 | 0        | 1         | 0.013986          | 0            | 0                |
|                      | 112                 | NC051              | <i>Gardnerella vaginalis</i> ATCC 14018 | 91.3 | 0        | 2         | 0.027972          | 0            | 0                |
|                      | 113                 | NC101              | <i>Gardnerella vaginalis</i> ATCC 14018 | 90   | 0        | 1         | 0.013986          | 0            | 0                |
|                      | 114                 | NC065              | <i>Gardnerella vaginalis</i> ATCC 14018 | 88.4 | 0        | 14        | 0.1958042         | 1522         | 0.2526972        |
|                      | 115                 | ND692              | <i>Gardnerella vaginalis</i> ATCC 14018 | 86   | 0        | 0         | 0                 | 9            | 0.0014943        |
|                      | 116                 | NC084              | <i>Gardnerella vaginalis</i> ATCC 14018 | 88.7 | 0        | 1         | 0.013986          | 0            | 0                |
|                      | 117                 | NC107              | <i>Gardnerella vaginalis</i> ATCC 14018 | 93.3 | 0        | 1         | 0.013986          | 0            | 0                |
| <b>8</b>             |                     |                    |                                         |      |          | <b>27</b> | <b>0.3776224</b>  | <b>6592</b>  | <b>1.0944676</b> |

Table S1: Nearest cpnDB neighbours and relative abundance of deep sequencing OTU (ND), library clones (NC) and isolates (N)

| Cluster <sup>1</sup> | Branch <sup>2</sup> | Label <sup>3</sup> | Nearest Neighbour <sup>4</sup>          | %ID  | Isolates | Clones     | % of total clones | Reads       | % of total reads |
|----------------------|---------------------|--------------------|-----------------------------------------|------|----------|------------|-------------------|-------------|------------------|
|                      | 118                 | ND865              | <i>Gardnerella vaginalis</i> ATCC 14018 | 86   | 0        | 0          | 0                 | 80          | 0.0132824        |
|                      | 119                 | NC130              | <i>Gardnerella vaginalis</i> ATCC 14018 | 90.4 | 0        | 140        | 1.958042          | 1922        | 0.319109         |
|                      | 120                 | NC131              | <i>Gardnerella vaginalis</i> ATCC 14018 | 88.2 | 0        | 15         | 0.2097902         | 0           | 0                |
|                      | 121                 | NC141              | <i>Gardnerella vaginalis</i> ATCC 14018 | 88.8 | 0        | 4          | 0.0559441         | 0           | 0                |
|                      | 122                 | NC140              | <i>Gardnerella vaginalis</i> ATCC 14018 | 90   | 0        | 2          | 0.027972          | 0           | 0                |
|                      | 123                 | NC183              | <i>Gardnerella vaginalis</i> ATCC 14018 | 88.7 | 0        | 1          | 0.013986          | 0           | 0                |
|                      | 124                 | NC092              | <i>Gardnerella vaginalis</i> ATCC 14018 | 88.4 | 0        | 1          | 0.013986          | 0           | 0                |
|                      | 125                 | NC142              | <i>Gardnerella vaginalis</i> ATCC 14018 | 89.9 | 0        | 60         | 0.8391608         | 0           | 0                |
|                      | 126                 | NC185              | <i>Gardnerella vaginalis</i> ATCC 14018 | 88.9 | 0        | 1          | 0.013986          | 0           | 0                |
|                      | 127                 | NC145              | <i>Gardnerella vaginalis</i> ATCC 14018 | 90.9 | 0        | 1          | 0.013986          | 0           | 0                |
|                      | 128                 | ND358              | <i>Gardnerella vaginalis</i> ATCC 14018 | 95   | 0        | 0          | 0                 | 51          | 0.0084675        |
|                      | 129                 | ND530              | <i>Gardnerella vaginalis</i> ATCC 14018 | 94   | 0        | 0          | 0                 | 8           | 0.0013282        |
|                      | 130                 | NC058              | <i>Gardnerella vaginalis</i> ATCC 14018 | 95.7 | 0        | 1          | 0.013986          | 0           | 0                |
|                      | 131                 | ND492              | <i>Gardnerella vaginalis</i> ATCC 14018 | 90.5 | 0        | 0          | 0                 | 47          | 0.0078034        |
| <b>9</b>             |                     |                    |                                         |      |          | <b>226</b> | <b>3.1608392</b>  | <b>2108</b> | <b>0.3499905</b> |
|                      | 132                 | NC083              | <i>Gardnerella vaginalis</i> ATCC 14018 | 88.6 | 0        | 1          | 0.013986          | 0           | 0                |
|                      | 133                 | N160               | <i>Gardnerella vaginalis</i> ATCC 14018 | 90.9 | 1        | 454        | 6.3496503         | 646         | 0.1072552        |
|                      | 134                 | NC071              | <i>Gardnerella vaginalis</i> ATCC 14018 | 88.6 | 0        | 1          | 0.013986          | 0           | 0                |
|                      | 135                 | NC068              | <i>Gardnerella vaginalis</i> ATCC 14018 | 89.1 | 0        | 1          | 0.013986          | 0           | 0                |
|                      | 136                 | NC072              | <i>Gardnerella vaginalis</i> ATCC 14018 | 88.4 | 0        | 2          | 0.027972          | 0           | 0                |
|                      | 137                 | ND527              | <i>Gardnerella vaginalis</i> ATCC 14018 | 88.6 | 0        | 0          | 0                 | 368         | 0.0610989        |
|                      | 138                 | NC137              | <i>Gardnerella vaginalis</i> ATCC 14018 | 90.6 | 0        | 7          | 0.0979021         | 0           | 0                |
|                      | 139                 | NC144              | <i>Gardnerella vaginalis</i> ATCC 14018 | 90.2 | 0        | 2          | 0.027972          | 0           | 0                |
|                      | 140                 | ND436              | <i>Gardnerella vaginalis</i> ATCC 14018 | 87.5 | 0        | 0          | 0                 | 12606       | 2.09297          |
|                      | 141                 | NC095              | <i>Gardnerella vaginalis</i> ATCC 14018 | 91.3 | 0        | 1          | 0.013986          | 0           | 0                |

Table S1: Nearest cpnDB neighbours and relative abundance of deep sequencing OTU (ND), library clones (NC) and isolates (N)

| Cluster <sup>1</sup> | Branch <sup>2</sup> | Label <sup>3</sup> | Nearest Neighbour <sup>4</sup>                 | %ID  | Isolates  | Clones     | % of total clones | Reads        | % of total reads |
|----------------------|---------------------|--------------------|------------------------------------------------|------|-----------|------------|-------------------|--------------|------------------|
|                      | 142                 | NC135              | <i>Gardnerella vaginalis</i> ATCC 14018        | 89.5 | 0         | 8          | 0.1118881         | 0            | 0                |
| <b>10</b>            |                     |                    |                                                |      | <b>1</b>  | <b>477</b> | <b>6.6713287</b>  | <b>13620</b> | <b>2.2613241</b> |
|                      | 143                 | ND416              | <i>Bifidobacterium pseudocatenulatum</i> D2CA  | 99.5 | 0         | 0          | 0                 | 23           | 0.0038187        |
|                      | 144                 | ND840              | <i>Bifidobacterium dentium</i> ATCC 27679      | 100  | 0         | 0          | 0                 | 92           | 0.0152747        |
|                      | 145                 | ND726              | <i>Bifidobacterium adolescentis</i> L2-32      | 95   | 0         | 0          | 0                 | 8            | 0.0013282        |
|                      | 146                 | N033               | <i>Bifidobacterium bifidum</i> JCM 1255        | 99.3 | 1         | 0          | 0                 | 0            | 0                |
|                      | 147                 | N010               | <i>Bifidobacterium longum</i> ATCC 15697       | 99.8 | 1         | 0          | 0                 | 0            | 0                |
|                      | 148                 | N081               | <i>Bifidobacterium longum</i> CCUG 52486       | 100  | 7         | 0          | 0                 | 0            | 0                |
|                      | 149                 | N103               | <i>Bifidobacterium longum</i> CCUG 52486       | 99.1 | 1         | 0          | 0                 | 0            | 0                |
| <b>11</b>            |                     |                    |                                                |      | <b>10</b> |            |                   | <b>123</b>   | <b>0.0204216</b> |
|                      | 150                 | N159               | No near neighbour                              | <85  | 1         | 0          | 0                 | 0            | 0                |
| <b>12</b>            |                     |                    |                                                |      | <b>1</b>  |            |                   |              |                  |
|                      | 151                 | ND020              | <i>Mobiluncus mulieris</i> ATCC 35239          | 100  | 0         | 0          | 0                 | 4187         | 0.6951662        |
|                      | 152                 | ND096              | <i>Mobiluncus mulieris</i> ATCC 35239          | 99.5 | 0         | 0          | 0                 | 148          | 0.0245724        |
| <b>13</b>            |                     |                    |                                                |      |           |            |                   | <b>4335</b>  | <b>0.7197386</b> |
|                      | 153                 | ND306              | <i>Mobiluncus curtisii holmesii</i> ATCC 35242 | 100  | 0         | 0          | 0                 | 538          | 0.089324         |
|                      | 154                 | ND611              | <i>Mobiluncus</i> sp. 192_1_67                 | 97.5 | 0         | 0          | 0                 | 4            | 0.0006641        |
| <b>14</b>            |                     |                    |                                                |      |           |            |                   | <b>542</b>   | <b>0.0899881</b> |
|                      | 155                 | ND771              | No near neighbour                              | <85  | 0         | 0          | 0                 | 84           | 0.0139465        |
| <b>15</b>            |                     |                    |                                                |      |           |            |                   | <b>84</b>    | <b>0.0139465</b> |
|                      | 156                 | ND160              | <i>Propionibacterium acnes</i> KPA171202       | 100  | 0         | 0          | 0                 | 31           | 0.0051469        |
| <b>16</b>            |                     |                    |                                                |      |           |            |                   | <b>31</b>    | <b>0.0051469</b> |
|                      | 157                 | ND768              | No near neighbour                              | <85  | 0         | 0          | 0                 | 1            | 0.000166         |
| <b>17</b>            |                     |                    |                                                |      |           |            |                   | <b>1</b>     | <b>0.000166</b>  |
|                      | 158                 | ND739              | No near neighbour                              | <85  | 0         | 0          | 0                 | 45           | 0.0074713        |

Table S1: Nearest cpnDB neighbours and relative abundance of deep sequencing OTU (ND), library clones (NC) and isolates (N)

| Cluster <sup>1</sup> | Branch <sup>2</sup> | Label <sup>3</sup> | Nearest Neighbour <sup>4</sup>                  | %ID  | Isolates | Clones   | % of total clones | Reads      | % of total reads |
|----------------------|---------------------|--------------------|-------------------------------------------------|------|----------|----------|-------------------|------------|------------------|
| <b>18</b>            |                     |                    |                                                 |      |          |          |                   | <b>45</b>  | <b>0.0074713</b> |
|                      | 159                 | ND484              | <i>Corynebacterium tuberculostearicum</i> SK141 | 99.5 | 0        | 0        | 0                 | 129        | 0.0214178        |
|                      | 160                 | ND537              | <i>Corynebacterium tuberculostearicum</i> SK141 | 96   | 0        | 0        | 0                 | 16         | 0.0026565        |
|                      | 161                 | ND460              | <i>Corynebacterium tuberculostearicum</i> SK141 | 95.6 | 0        | 0        | 0                 | 3          | 0.0004981        |
| <b>19</b>            |                     |                    |                                                 |      |          |          |                   | <b>148</b> | <b>0.0245724</b> |
|                      | 162                 | ND847              | No near neighbour                               | <85  | 0        | 0        | 0                 | 25         | 0.0041507        |
| <b>20</b>            |                     |                    |                                                 |      |          |          |                   | <b>25</b>  | <b>0.0041507</b> |
|                      | 163                 | ND682              | No near neighbour                               | <85  | 0        | 0        | 0                 | 6          | 0.0009962        |
| <b>21</b>            |                     |                    |                                                 |      |          |          |                   | <b>6</b>   | <b>0.0009962</b> |
|                      | 164                 | ND542              | <i>Corynebacterium jeikeium</i> ATCC 43734      | 96.5 | 0        | 0        | 0                 | 7          | 0.0011622        |
|                      | 165                 | ND548              | <i>Corynebacterium jeikeium</i> ATCC 43734      | 93   | 0        | 0        | 0                 | 8          | 0.0013282        |
| <b>22</b>            |                     |                    |                                                 |      |          |          |                   | <b>15</b>  | <b>0.0024904</b> |
|                      | 166                 | ND700              | Unknown sp. 192_1_65                            | 99.5 | 0        | 0        | 0                 | 19         | 0.0031546        |
| <b>23</b>            |                     |                    |                                                 |      |          |          |                   | <b>19</b>  | <b>0.0031546</b> |
|                      | 167                 | ND451              | No near neighbour                               | <85  | 0        | 0        | 0                 | 6          | 0.0009962        |
|                      | 168                 | NC122              | No near neighbour                               | <85  | 0        | 1        | 0.013986          | 0          | 0                |
|                      | 169                 | ND148              | No near neighbour                               | <85  | 0        | 0        | 0                 | 23         | 0.0038187        |
| <b>24</b>            |                     |                    |                                                 |      |          | <b>1</b> | <b>0.013986</b>   | <b>29</b>  | <b>0.0048149</b> |
|                      | 170                 | ND031              | <i>Slackia exigua</i> ATCC 700122               | 99.5 | 0        | 0        | 0                 | 189        | 0.0313796        |
| <b>25</b>            |                     |                    |                                                 |      |          |          |                   | <b>189</b> | <b>0.0313796</b> |
|                      | 171                 | ND145              | <i>Eggerthella lenta</i> DSM 2243               | 89   | 0        | 0        | 0                 | 33         | 0.005479         |
| <b>26</b>            |                     |                    |                                                 |      |          |          |                   | <b>33</b>  | <b>0.005479</b>  |
|                      | 172                 | ND836              | <i>Atopobium vaginae</i> PB189-T1-4             | 100  | 0        | 0        | 0                 | 15         | 0.0024904        |
|                      | 173                 | NC119              | <i>Atopobium vaginae</i> PB189-T1-4             | 98.6 | 0        | 1        | 0.013986          | 0          | 0                |
| <b>27</b>            |                     |                    |                                                 |      |          | <b>1</b> | <b>0.013986</b>   | <b>15</b>  | <b>0.0024904</b> |

Table S1: Nearest cpnDB neighbours and relative abundance of deep sequencing OTU (ND), library clones (NC) and isolates (N)

| Cluster <sup>1</sup> | Branch <sup>2</sup> | Label <sup>3</sup> | Nearest Neighbour <sup>4</sup>                     | %ID  | Isolates | Clones     | % of total clones | Reads       | % of total reads |
|----------------------|---------------------|--------------------|----------------------------------------------------|------|----------|------------|-------------------|-------------|------------------|
|                      | 174                 | NC045              | <i>Atopobium vaginae</i> DSM15829                  | 98   | 0        | 5          | 0.0699301         | 0           | 0                |
|                      | 175                 | ND128              | <i>Atopobium vaginae</i> DSM15829                  | 100  | 0        | 0          | 0                 | 184         | 0.0305495        |
|                      | 176                 | NC108              | <i>Atopobium vaginae</i> DSM15829                  | 96.4 | 0        | 1          | 0.013986          | 0           | 0                |
|                      | 177                 | ND106              | <i>Atopobium vaginae</i> DSM15829                  | 97   | 0        | 0          | 0                 | 2625        | 0.4358279        |
|                      | 178                 | ND010              | <i>Atopobium vaginae</i> DSM15829                  | 96.5 | 0        | 0          | 0                 | 3942        | 0.6544889        |
|                      | 179                 | NC047              | <i>Atopobium vaginae</i> DSM15829                  | 97.5 | 0        | 117        | 1.6363636         | 0           | 0                |
| <b>28</b>            |                     |                    |                                                    |      |          | <b>123</b> | <b>1.7202797</b>  | <b>6751</b> | <b>1.1208663</b> |
|                      | 180                 | ND538              | <i>Streptococcus</i> sp. (v5264)                   | 99.5 | 0        | 0          | 0                 | 105         | 0.0174331        |
|                      | 181                 | N142               | <i>Streptococcus pseudopneumoniae</i> ATCC BAA-960 | 93.7 | 2        | 0          | 0                 | 0           | 0                |
|                      | 182                 | ND280              | <i>Streptococcus</i> sp. (v5264)                   | 99   | 0        | 0          | 0                 | 7           | 0.0011622        |
|                      | 183                 | N163               | <i>Streptococcus mitis</i> ATCC 49456              | 94.6 | 1        | 0          | 0                 | 0           | 0                |
|                      | 184                 | N080               | <i>Streptococcus mitis</i> ATCC 49456              | 94.4 | 1        | 0          | 0                 | 0           | 0                |
|                      | 185                 | N127               | <i>Streptococcus pneumoniae</i> SP14-BS69          | 94.6 | 1        | 0          | 0                 | 0           | 0                |
|                      | 186                 | ND446              | <i>Streptococcus infantis</i> ATCC 700779          | 89   | 0        | 0          | 0                 | 26          | 0.0043168        |
| <b>29</b>            |                     |                    |                                                    |      |          | <b>5</b>   |                   | <b>138</b>  | <b>0.0229121</b> |
|                      | 187                 | N085               | <i>Streptococcus anginosus</i> ATCC 33397          | 95.3 | 2        | 0          | 0                 | 0           | 0                |
|                      | 188                 | N121               | <i>Streptococcus anginosus</i> ATCC 33397          | 96.2 | 1        | 0          | 0                 | 0           | 0                |
|                      | 189                 | N124               | <i>Streptococcus constellatus</i> ATCC 27823       | 96.9 | 4        | 0          | 0                 | 0           | 0                |
| <b>30</b>            |                     |                    |                                                    |      |          | <b>7</b>   |                   |             |                  |
|                      | 190                 | NC132              | <i>Streptococcus salivarius</i> ATCC 7073          | 95.8 | 0        | 1          | 0.013986          | 0           | 0                |
|                      | 191                 | NC184              | <i>Streptococcus salivarius</i> ATCC 7073          | 95.8 | 0        | 17         | 0.2377622         | 0           | 0                |
| <b>31</b>            |                     |                    |                                                    |      |          | <b>18</b>  | <b>0.2517483</b>  |             |                  |
|                      | 192                 | N011               | <i>Streptococcus gallolyticus</i> CCUG35224        | 99.3 | 5        | 0          | 0                 | 19          | 0.0031546        |
|                      | 193                 | N001               | <i>Streptococcus infantarius</i> CCUG 43822        | 100  | 3        | 0          | 0                 | 0           | 0                |
|                      | 194                 | N009               | <i>Streptococcus lutetiensis</i> ATCC BAA-103      | 99.8 | 1        | 0          | 0                 | 0           | 0                |

Table S1: Nearest cpnDB neighbours and relative abundance of deep sequencing OTU (ND), library clones (NC) and isolates (N)

| Cluster <sup>1</sup> | Branch <sup>2</sup> | Label <sup>3</sup> | Nearest Neighbour <sup>4</sup>                   | %ID  | Isolates  | Clones | % of total clones | Reads      | % of total reads |
|----------------------|---------------------|--------------------|--------------------------------------------------|------|-----------|--------|-------------------|------------|------------------|
|                      | 195                 | N128               | <i>Streptococcus agalactiae</i> ATCC 12386       | 100  | 4         | 0      | 0                 | 0          | 0                |
| <b>32</b>            |                     |                    |                                                  |      | <b>13</b> |        |                   | <b>19</b>  | <b>0.0031546</b> |
|                      | 196                 | N040               | <i>Enterococcus raffinosus</i> ATCC 49427        | 100  | 2         | 0      | 0                 | 0          | 0                |
|                      | 197                 | N162               | <i>Enterococcus faecalis</i> ATCC 49332          | 99.6 | 1         | 0      | 0                 | 0          | 0                |
| <b>33</b>            |                     |                    |                                                  |      | <b>3</b>  |        |                   |            |                  |
|                      | 198                 | N167               | <i>Bacillus cereus</i> ATCC 10876                | 98   | 1         | 0      | 0                 | 0          | 0                |
|                      | 199                 | N099               | <i>Gemella haemolysans</i> ATCC 10379            | 92.2 | 1         | 0      | 0                 | 0          | 0                |
|                      | 200                 | N100               | <i>Gemella haemolysans</i> z1643                 | 98   | 1         | 0      | 0                 | 0          | 0                |
| <b>34</b>            |                     |                    |                                                  |      | <b>3</b>  |        |                   |            |                  |
|                      | 201                 | N118               | <i>Staphylococcus lugdunensis</i> CRSN850412     | 99.8 | 1         | 0      | 0                 | 0          | 0                |
|                      | 202                 | N122               | <i>Staphylococcus lugdunensis</i> CRSN850412     | 98.9 | 1         | 0      | 0                 | 0          | 0                |
|                      | 203                 | N082               | <i>Staphylococcus lugdunensis</i> CRSN850412     | 95.1 | 1         | 0      | 0                 | 0          | 0                |
|                      | 204                 | N111               | <i>Staphylococcus muscae</i> CCS767              | 98.9 | 1         | 0      | 0                 | 0          | 0                |
|                      | 205                 | N113               | <i>Staphylococcus muscae</i> CCS767              | 99.8 | 1         | 0      | 0                 | 0          | 0                |
| <b>35</b>            |                     |                    |                                                  |      | <b>5</b>  |        |                   |            |                  |
|                      | 206                 | N119               | <i>Staphylococcus piscifermentans</i> ATCC 51136 | 99.5 | 1         | 0      | 0                 | 0          | 0                |
|                      | 207                 | N106               | <i>Staphylococcus simulans</i> ATCC 27848        | 99.1 | 1         | 0      | 0                 | 0          | 0                |
|                      | 208                 | N104               | <i>Staphylococcus hominis</i> ATCC 27844         | 99.8 | 1         | 0      | 0                 | 0          | 0                |
| <b>36</b>            |                     |                    |                                                  |      | <b>3</b>  |        |                   |            |                  |
|                      | 209                 | N102               | <i>Staphylococcus haemolyticus</i> ATCC 29970    | 100  | 1         | 0      | 0                 | 0          | 0                |
|                      | 210                 | N125               | <i>Staphylococcus haemolyticus</i> ATCC 29970    | 98.9 | 1         | 0      | 0                 | 0          | 0                |
| <b>37</b>            |                     |                    |                                                  |      | <b>2</b>  |        |                   |            |                  |
|                      | 211                 | ND032              | No near neighbour                                | <85  | 0         | 0      | 0                 | 871        | 0.1446118        |
| <b>38</b>            |                     |                    |                                                  |      |           |        |                   | <b>871</b> | <b>0.1446118</b> |
|                      | 212                 | N065               | No near neighbour                                | <85  | 1         | 0      | 0                 | 0          | 0                |



Table S1: Nearest cpnDB neighbours and relative abundance of deep sequencing OTU (ND), library clones (NC) and isolates (N)

| Cluster <sup>1</sup> | Branch <sup>2</sup> | Label <sup>3</sup> | Nearest Neighbour <sup>4</sup>             | %ID  | Isolates  | Clones    | % of total clones | Reads        | % of total reads |
|----------------------|---------------------|--------------------|--------------------------------------------|------|-----------|-----------|-------------------|--------------|------------------|
| <b>39</b>            |                     |                    |                                            |      | <b>1</b>  |           |                   |              |                  |
|                      | 213                 | N018               | <i>Lactobacillus</i> sp. N6                | 98.9 | 2         | 7         | 0.0979021         | 375          | 0.0622611        |
|                      | 214                 | N023               | <i>Lactobacillus</i> sp. N6                | 99.8 | 5         | 13        | 0.1818182         | 0            | 0                |
|                      | 215                 | ND307              | <i>Lactobacillus</i> sp. N6                | 100  | 0         | 0         | 0                 | 13057        | 2.1678494        |
|                      | 216                 | N006               | <i>Lactobacillus</i> sp. N6                | 99.8 | 1         | 0         | 0                 | 0            | 0                |
|                      | 217                 | N139               | <i>Lactobacillus</i> sp. N6                | 97.8 | 1         | 0         | 0                 | 0            | 0                |
|                      | 218                 | N068               | <i>Lactobacillus</i> sp. N6                | 96.6 | 4         | 0         | 0                 | 0            | 0                |
| <b>40</b>            |                     |                    |                                            |      | <b>13</b> | <b>20</b> | <b>0.2797203</b>  | <b>13432</b> | <b>2.2301105</b> |
|                      | 219                 | N019               | <i>Lactobacillus reuteri</i> JCM 1112      | 92.8 | 1         | 0         | 0                 | 0            | 0                |
|                      | 220                 | N047               | <i>Lactobacillus reuteri</i> JCM 1112      | 100  | 1         | 0         | 0                 | 0            | 0                |
|                      | 221                 | N020               | <i>Lactobacillus coleohominis</i> 101-4-CH | 97.5 | 5         | 0         | 0                 | 187          | 0.0310475        |
|                      | 222                 | N073               | <i>Lactobacillus coleohominis</i> 101-4-CH | 99.8 | 1         | 0         | 0                 | 0            | 0                |
| <b>41</b>            |                     |                    |                                            |      | <b>8</b>  |           |                   | <b>187</b>   | <b>0.0310475</b> |
|                      | 223                 | N027               | No near neighbour                          | <85  | 1         | 0         | 0                 | 0            | 0                |
|                      | 224                 | N054               | No near neighbour                          | <85  | 1         | 0         | 0                 | 802          | 0.1331558        |
| <b>42</b>            |                     |                    |                                            |      | <b>2</b>  |           |                   | <b>802</b>   | <b>0.1331558</b> |
|                      | 225                 | N017               | <i>Lactobacillus plantarum</i> l18A        | 99.8 | 2         | 0         | 0                 | 0            | 0                |
|                      | 226                 | N078               | <i>Pediococcus pentosaceus</i> ATCC 25745  | 99.3 | 1         | 0         | 0                 | 0            | 0                |
|                      | 227                 | N039               | <i>Lactobacillus ruminis</i> ATCC 25644    | 99.3 | 4         | 0         | 0                 | 0            | 0                |
|                      | 228                 | N035               | No near neighbour                          | <85  | 3         | 0         | 0                 | 0            | 0                |
| <b>43</b>            |                     |                    |                                            |      | <b>10</b> |           |                   |              |                  |
|                      | 229                 | N003               | <i>Lactobacillus salivarius</i> DSM 20555  | 100  | 12        | 13        | 0.1818182         | 1703         | 0.2827485        |
|                      | 230                 | N042               | <i>Lactobacillus salivarius</i> JCM 1042   | 99.8 | 2         | 0         | 0                 | 0            | 0                |
| <b>44</b>            |                     |                    |                                            |      | <b>14</b> | <b>13</b> | <b>0.1818182</b>  | <b>1703</b>  | <b>0.2827485</b> |
|                      | 231                 | ND111              | <i>Lactobacillus iners</i> DSM 13335       | 98   | 0         | 0         | 0                 | 151          | 0.0250705        |

Table S1: Nearest cpnDB neighbours and relative abundance of deep sequencing OTU (ND), library clones (NC) and isolates (N)

| Cluster <sup>1</sup> | Branch <sup>2</sup> | Label <sup>3</sup> | Nearest Neighbour <sup>4</sup>          | %ID  | Isolates | Clones      | % of total clones | Reads        | % of total reads |
|----------------------|---------------------|--------------------|-----------------------------------------|------|----------|-------------|-------------------|--------------|------------------|
|                      | 232                 | ND246              | <i>Lactobacillus iners</i> DSM 13335    | 98.5 | 0        | 0           | 0                 | 17730        | 2.943706         |
|                      | 233                 | NC009              | <i>Lactobacillus iners</i> DSM 13335    | 98.2 | 0        | 16          | 0.2237762         | 732          | 0.1215337        |
|                      | 234                 | ND279              | <i>Lactobacillus iners</i> DSM 13335    | 99   | 0        | 0           | 0                 | 85           | 0.0141125        |
|                      | 235                 | NC011              | <i>Lactobacillus iners</i> DSM 13335    | 96.4 | 0        | 3           | 0.041958          | 0            | 0                |
|                      | 236                 | ND471              | <i>Lactobacillus iners</i> DSM 13335    | 99.5 | 0        | 0           | 0                 | 12           | 0.0019924        |
|                      | 237                 | NC013              | <i>Lactobacillus iners</i> DSM 13335    | 98.9 | 0        | 2           | 0.027972          | 446          | 0.0740492        |
|                      | 238                 | NC014              | <i>Lactobacillus iners</i> DSM 13335    | 98.9 | 0        | 1           | 0.013986          | 40617        | 6.743627         |
|                      | 239                 | ND347              | <i>Lactobacillus iners</i> DSM 13335    | 98.5 | 0        | 0           | 0                 | 106          | 0.0175991        |
|                      | 240                 | NC041              | <i>Lactobacillus iners</i> A3M7         | 99.3 | 0        | 439         | 6.1398601         | 25           | 0.0041507        |
|                      | 241                 | ND019              | <i>Lactobacillus iners</i> A3M7         | 99   | 0        | 0           | 0                 | 460          | 0.0763736        |
|                      | 242                 | NC005              | <i>Lactobacillus iners</i> A3M7         | 98.2 | 0        | 2715        | 37.972028         | 0            | 0                |
|                      | 243                 | ND006              | <i>Lactobacillus iners</i> DSM 13335    | 99.5 | 0        | 0           | 0                 | 10           | 0.0016603        |
|                      | 244                 | NC010              | <i>Lactobacillus iners</i> DSM 13335    | 97.5 | 0        | 2           | 0.027972          | 0            | 0                |
| <b>45</b>            |                     |                    |                                         |      |          | <b>3178</b> | <b>44.447552</b>  | <b>60374</b> | <b>10.023875</b> |
|                      | 245                 | ND675              | <i>Lactobacillus crispatus</i> CECT4840 | 99.5 | 0        | 0           | 0                 | 81           | 0.0134484        |
|                      | 246                 | ND734              | <i>Lactobacillus crispatus</i> CECT4840 | 99.5 | 0        | 0           | 0                 | 13           | 0.0021584        |
|                      | 247                 | ND562              | <i>Lactobacillus crispatus</i> CECT4840 | 99.5 | 0        | 0           | 0                 | 12           | 0.0019924        |
|                      | 248                 | N028               | <i>Lactobacillus crispatus</i> CECT4840 | 100  | 5        | 1089        | 15.230769         | 36472        | 6.055434         |
|                      | 249                 | ND863              | <i>Lactobacillus crispatus</i> CECT4840 | 99   | 0        | 0           | 0                 | 3            | 0.0004981        |
|                      | 250                 | ND021              | <i>Lactobacillus crispatus</i> CECT4840 | 99.5 | 0        | 0           | 0                 | 5            | 0.0008301        |
|                      | 251                 | ND319              | <i>Lactobacillus crispatus</i> CECT4840 | 99.5 | 0        | 0           | 0                 | 13           | 0.0021584        |
|                      | 252                 | ND623              | <i>Lactobacillus crispatus</i> CECT4840 | 99.5 | 0        | 0           | 0                 | 9            | 0.0014943        |
|                      | 253                 | NC002              | <i>Lactobacillus crispatus</i> CECT4840 | 98.2 | 0        | 1           | 0.013986          | 0            | 0                |
|                      | 254                 | ND443              | <i>Lactobacillus crispatus</i> CECT4840 | 99.5 | 0        | 0           | 0                 | 6            | 0.0009962        |
|                      | 255                 | NC001              | <i>Lactobacillus crispatus</i> CECT4840 | 97.6 | 0        | 10          | 0.1398601         | 0            | 0                |

Table S1: Nearest cpnDB neighbours and relative abundance of deep sequencing OTU (ND), library clones (NC) and isolates (N)

| Cluster <sup>1</sup> | Branch <sup>2</sup> | Label <sup>3</sup> | Nearest Neighbour <sup>4</sup>                   | %ID  | Isolates  | Clones      | % of total clones | Reads        | % of total reads |
|----------------------|---------------------|--------------------|--------------------------------------------------|------|-----------|-------------|-------------------|--------------|------------------|
| <b>46</b>            |                     |                    |                                                  |      |           | <b>1100</b> | <b>15.384615</b>  | <b>36614</b> | <b>6.0790102</b> |
|                      | 256                 | N012               | <i>Lactobacillus gasseri</i> MV-22               | 100  | 1         | 0           | 0                 | 0            | 0                |
|                      | 257                 | N038               | <i>Lactobacillus gasseri</i> MV-22               | 99.7 | 4         | 0           | 0                 | 0            | 0                |
|                      | 258                 | N022               | <i>Lactobacillus gasseri</i> ATCC 9857           | 98.9 | 1         | 0           | 0                 | 0            | 0                |
|                      | 259                 | N048               | <i>Lactobacillus gasseri</i> ATCC 9857           | 98.7 | 5         | 0           | 0                 | 0            | 0                |
|                      | 260                 | N002               | <i>Lactobacillus johnsonii</i> NCC 533           | 99.3 | 1         | 0           | 0                 | 0            | 0                |
| <b>47</b>            |                     |                    |                                                  |      | <b>12</b> |             |                   |              |                  |
|                      | 261                 | N046               | <i>Lactobacillus delbrueckii</i> PB2003/044-T3-4 | 99.8 | 2         | 0           | 0                 | 2            | 0.0003321        |
| <b>48</b>            |                     |                    |                                                  |      | <b>2</b>  |             |                   | <b>2</b>     | <b>0.00033</b>   |
|                      | 262                 | ND439              | <i>Lactobacillus jensenii</i> ATCC 25258         | 100  | 0         | 0           | 0                 | 11029        | 1.8311412        |
|                      | 263                 | N154               | <i>Lactobacillus jensenii</i> ATCC 25258         | 100  | 3         | 0           | 0                 | 0            | 0                |
|                      | 264                 | ND667              | <i>Lactobacillus jensenii</i> ATCC 25258         | 96   | 0         | 0           | 0                 | 1695         | 0.2814203        |
|                      | 265                 | ND401              | <i>Lactobacillus jensenii</i> ATCC 25258         | 95   | 0         | 0           | 0                 | 8568         | 1.4225422        |
|                      | 266                 | N004               | <i>Lactobacillus jensenii</i> ATCC 25258         | 95.7 | 4         | 0           | 0                 | 0            | 0                |
| <b>49</b>            |                     |                    |                                                  |      | <b>7</b>  |             |                   | <b>21292</b> | <b>3.5351037</b> |
|                      | 267                 | ND633              | Clone unknown hpoC_006_a04                       | 100  | 0         | 0           | 0                 | 6            | 0.0009962        |
|                      | 268                 | ND860              | <i>Faecalibacterium prausnitzii</i> A2-165       | 98   | 0         | 0           | 0                 | 9            | 0.0014943        |
|                      | 269                 | NC124              | <i>Clostridium</i> genomosp. BVAB3 UPII9-5       | 86.4 | 0         | 3           | 0.041958          | 0            | 0                |
| <b>50</b>            |                     |                    |                                                  |      |           | <b>3</b>    | <b>0.041958</b>   | <b>15</b>    | <b>0.0024904</b> |
|                      | 270                 | ND550              | No near neighbour                                | <85  | 0         | 0           | 0                 | 41           | 0.0068072        |
|                      | 271                 | NC015              | No near neighbour                                | <85  | 0         | 1           | 0.013986          | 0            | 0                |
|                      | 272                 | ND784              | <i>Bacteroides coagulans</i> JCM 12528           | 98   | 0         | 0           | 0                 | 77           | 0.0127843        |
| <b>51</b>            |                     |                    |                                                  |      |           | <b>1</b>    | <b>0.013986</b>   | <b>118</b>   | <b>0.0195915</b> |
|                      | 273                 | ND116              | No near neighbour                                | <85  | 0         | 0           | 0                 | 12           | 0.0019924        |
|                      | 274                 | NC053              | No near neighbour                                | <85  | 0         | 295         | 4.1258741         | 27121        | 4.5028906        |

Table S1: Nearest cpnDB neighbours and relative abundance of deep sequencing OTU (ND), library clones (NC) and isolates (N)

| Cluster <sup>1</sup> | Branch <sup>2</sup> | Label <sup>3</sup> | Nearest Neighbour <sup>4</sup>                   | %ID  | Isolates | Clones     | % of total clones | Reads        | % of total reads |
|----------------------|---------------------|--------------------|--------------------------------------------------|------|----------|------------|-------------------|--------------|------------------|
|                      | 275                 | ND756              | No near neighbour                                | <85  | 0        | 0          | 0                 | 6            | 0.0009962        |
|                      | 276                 | NC029              | No near neighbour                                | <85  | 0        | 19         | 0.2657343         | 0            | 0                |
|                      | 277                 | NC173              | No near neighbour                                | <85  | 0        | 4          | 0.0559441         | 0            | 0                |
|                      | 278                 | ND059              | No near neighbour                                | <85  | 0        | 0          | 0                 | 6312         | 1.0479793        |
|                      | 279                 | ND332              | No near neighbour                                | <85  | 0        | 0          | 0                 | 133          | 0.0220819        |
| <b>52</b>            |                     |                    |                                                  |      |          | <b>318</b> | <b>4.4475524</b>  | <b>33584</b> | <b>5.5759403</b> |
|                      | 280                 | ND318              | <i>Megasphaera</i> sp. genomosp. type_1 str. 28L | 99.5 | 0        | 0          | 0                 | 6754         | 1.1213644        |
|                      | 281                 | ND722              | <i>Megasphaera</i> sp. genomosp. type_1 str. 28L | 99   | 0        | 0          | 0                 | 5            | 0.0008301        |
|                      | 282                 | ND635              | <i>Megasphaera</i> sp. genomosp. type_1 str. 28L | 99   | 0        | 0          | 0                 | 8            | 0.0013282        |
|                      | 283                 | ND630              | <i>Megasphaera</i> sp. genomosp. type_1 str. 28L | 99   | 0        | 0          | 0                 | 21           | 0.0034866        |
|                      | 284                 | NC044              | <i>Megasphaera</i> sp. genomosp. type_1 str. 28L | 99.6 | 0        | 200        | 2.7972028         | 42452        | 7.0482914        |
|                      | 285                 | ND479              | <i>Megasphaera</i> sp. genomosp. type_1 str. 28L | 99.5 | 0        | 0          | 0                 | 54           | 0.0089656        |
|                      | 286                 | ND657              | <i>Megasphaera</i> sp. genomosp. type_1 str. 28L | 99.5 | 0        | 0          | 0                 | 7            | 0.0011622        |
|                      | 287                 | ND665              | <i>Megasphaera</i> sp. genomosp. type_1 str. 28L | 99.5 | 0        | 0          | 0                 | 7            | 0.0011622        |
|                      | 288                 | NC077              | <i>Megasphaera</i> sp. genomosp. type_1 str. 28L | 98.9 | 0        | 1          | 0.013986          | 0            | 0                |
|                      | 289                 | ND353              | <i>Megasphaera</i> sp. genomosp. type_1 str. 28L | 96.5 | 0        | 0          | 0                 | 1428         | 0.2370904        |
|                      | 290                 | NC086              | No near neighbour                                | <85  | 0        | 1          | 0.013986          | 0            | 0                |
| <b>53</b>            |                     |                    |                                                  |      |          | <b>202</b> | <b>2.8251748</b>  | <b>50736</b> | <b>8.4236811</b> |
|                      | 291                 | ND625              | No near neighbour                                | <85  | 0        | 0          | 0                 | 21           | 0.0034866        |
|                      | 292                 | ND839              | <i>Clostridia</i> sp. 192_1_59                   | 98.5 | 0        | 0          | 0                 | 352          | 0.0584424        |
| <b>54</b>            |                     |                    |                                                  |      |          |            |                   | <b>373</b>   | <b>0.0619291</b> |
|                      | 293                 | NC146              | No near neighbour                                | <85  | 0        | 4          | 0.0559441         | 0            | 0                |
|                      | 294                 | NC150              | No near neighbour                                | <85  | 0        | 3          | 0.041958          | 0            | 0                |
|                      | 295                 | NC147              | No near neighbour                                | <85  | 0        | 1          | 0.013986          | 0            | 0                |
| <b>55</b>            |                     |                    |                                                  |      |          | <b>8</b>   | <b>0.1118881</b>  |              |                  |

Table S1: Nearest cpnDB neighbours and relative abundance of deep sequencing OTU (ND), library clones (NC) and isolates (N)

| Cluster <sup>1</sup> | Branch <sup>2</sup> | Label <sup>3</sup> | Nearest Neighbour <sup>4</sup>     | %ID  | Isolates | Clones     | % of total clones | Reads        | % of total reads |
|----------------------|---------------------|--------------------|------------------------------------|------|----------|------------|-------------------|--------------|------------------|
|                      | 296                 | ND375              | No near neighbour                  | <85  | 0        | 0          | 0                 | 161          | 0.0267308        |
|                      | 297                 | NC040              | No near neighbour                  | <85  | 0        | 100        | 1.3986014         | 13882        | 2.3048238        |
|                      | 298                 | ND198              | No near neighbour                  | <85  | 0        | 0          | 0                 | 7            | 0.0011622        |
|                      | 299                 | NC158              | No near neighbour                  | <85  | 0        | 2          | 0.027972          | 0            | 0                |
|                      | 300                 | ND752              | <i>Dialister invisus</i> DSM 15470 | 96.5 | 0        | 0          | 0                 | 61           | 0.0101278        |
| <b>56</b>            |                     |                    |                                    |      |          | <b>102</b> | <b>1.4265734</b>  | <b>14111</b> | <b>2.3428446</b> |
|                      | 301                 | NC168              | No near neighbour                  | <85  | 0        | 1          | 0.013986          | 0            | 0                |
|                      | 302                 | NC021              | No near neighbour                  | <85  | 0        | 1          | 0.013986          | 0            | 0                |
|                      | 303                 | ND065              | No near neighbour                  | <85  | 0        | 0          | 0                 | 117          | 0.0194255        |
|                      | 304                 | NC118              | No near neighbour                  | <85  | 0        | 3          | 0.041958          | 0            | 0                |
|                      | 305                 | ND291              | No near neighbour                  | <85  | 0        | 0          | 0                 | 2655         | 0.4408088        |
|                      | 306                 | NC154              | No near neighbour                  | <85  | 0        | 1          | 0.013986          | 0            | 0                |
|                      | 307                 | ND431              | No near neighbour                  | <85  | 0        | 0          | 0                 | 224          | 0.0371906        |
|                      | 308                 | NC153              | No near neighbour                  | <85  | 0        | 5          | 0.0699301         | 0            | 0                |
|                      | 309                 | NC038              | No near neighbour                  | <85  | 0        | 1          | 0.013986          | 0            | 0                |
|                      | 310                 | NC039              | No near neighbour                  | <85  | 0        | 81         | 1.1328671         | 2349         | 0.3900037        |
| <b>57</b>            |                     |                    |                                    |      |          | <b>93</b>  | <b>1.3006993</b>  | <b>5345</b>  | <b>0.8874286</b> |
|                      | 311                 | N169               | No near neighbour                  | <85  | 1        | 0          | 0                 | 0            | 0                |
|                      | 312                 | ND638              | No near neighbour                  | <85  | 0        | 0          | 0                 | 2            | 0.0003321        |
|                      | 313                 | NC096              | No near neighbour                  | <85  | 0        | 1          | 0.013986          | 0            | 0                |
| <b>58</b>            |                     |                    |                                    |      | <b>1</b> | <b>1</b>   | <b>0.013986</b>   | <b>2</b>     | <b>0.0003321</b> |
|                      | 314                 | ND038              | <i>Sphingobium japonicum</i> UT26S | 89.5 | 0        | 0          | 0                 | 1613         | 0.2678059        |
|                      | 315                 | ND658              | <i>Sphingomonas wittichii</i> RW1  | 89.5 | 0        | 0          | 0                 | 408          | 0.0677401        |
|                      | 316                 | ND856              | <i>Sphingomonas wittichii</i> RW1  | 92.5 | 0        | 0          | 0                 | 4            | 0.0006641        |
|                      | 317                 | ND857              | <i>Sphingomonas wittichii</i> RW1  | 92.5 | 0        | 0          | 0                 | 417          | 0.0692344        |

Table S1: Nearest cpnDB neighbours and relative abundance of deep sequencing OTU (ND), library clones (NC) and isolates (N)

| Cluster <sup>1</sup> | Branch <sup>2</sup> | Label <sup>3</sup> | Nearest Neighbour <sup>4</sup>                 | %ID  | Isolates | Clones | % of total clones | Reads       | % of total reads |
|----------------------|---------------------|--------------------|------------------------------------------------|------|----------|--------|-------------------|-------------|------------------|
| <b>59</b>            |                     |                    |                                                |      |          |        |                   | <b>2442</b> | <b>0.4054444</b> |
|                      | 318                 | ND057              | <i>Methylobacterium radiotolerans</i> JCM 2831 | 98.5 | 0        | 0      | 0                 | 79          | 0.0131163        |
| <b>60</b>            |                     |                    |                                                |      |          |        |                   | <b>79</b>   | <b>0.0131163</b> |
|                      | 319                 | ND614              | <i>Rhodopseudomonas palustris</i> HaA2         | 92.5 | 0        | 0      | 0                 | 80          | 0.0132824        |
|                      | 320                 | ND690              | <i>Bradyrhizobium japonicum</i> USDA110        | 89   | 0        | 0      | 0                 | 13          | 0.0021584        |
| <b>61</b>            |                     |                    |                                                |      |          |        |                   | <b>93</b>   | <b>0.0154408</b> |
|                      | 321                 | ND652              | <i>Mesorhizobium amorphae</i> DSM 21831        | 90.5 | 0        | 0      | 0                 | 95          | 0.0157728        |
|                      | 322                 | ND056              | No near neighbour                              | <85  | 0        | 0      | 0                 | 14          | 0.0023244        |
| <b>62</b>            |                     |                    |                                                |      |          |        |                   | <b>109</b>  | <b>0.0180972</b> |
|                      | 323                 | ND251              | <i>Bradyrhizobium japonicum</i> USDA110        | 90   | 0        | 0      | 0                 | 79          | 0.0131163        |
|                      | 324                 | ND788              | <i>Bradyrhizobium japonicum</i> USDA110        | 92.5 | 0        | 0      | 0                 | 18          | 0.0029885        |
| <b>63</b>            |                     |                    |                                                |      |          |        |                   | <b>97</b>   | <b>0.0161049</b> |
|                      | 325                 | ND559              | <i>Mesorhizobium opportunistum</i> WSM 2075    | 87.5 | 0        | 0      | 0                 | 91          | 0.0151087        |
|                      | 326                 | ND643              | <i>Rhizobium etli</i> CFN 42                   | 89   | 0        | 0      | 0                 | 16          | 0.0026565        |
|                      | 327                 | ND447              | No near neighbour                              | <85  | 0        | 0      | 0                 | 1           | 0.000166         |
| <b>64</b>            |                     |                    |                                                |      |          |        |                   | <b>108</b>  | <b>0.0179312</b> |
|                      | 328                 | ND253              | <i>Variovorax paradoxus</i> z1389              | 98   | 0        | 0      | 0                 | 7216        | 1.1980701        |
|                      | 329                 | ND713              | No near neighbour                              | <85  | 0        | 0      | 0                 | 139         | 0.0230781        |
|                      | 330                 | ND427              | <i>Comamonas terrigena</i> ATCC 8461           | 88   | 0        | 0      | 0                 | 1219        | 0.2023902        |
|                      | 331                 | ND765              | <i>Comamonas terrigena</i> ATCC 8461           | 91   | 0        | 0      | 0                 | 447         | 0.0742153        |
| <b>65</b>            |                     |                    |                                                |      |          |        |                   | <b>9021</b> | <b>1.4977536</b> |
|                      | 332                 | ND481              | <i>Moraxella</i> sp. z390                      | 99   | 0        | 0      | 0                 | 55          | 0.0091316        |
| <b>66</b>            |                     |                    |                                                |      |          |        |                   | <b>55</b>   | <b>0.0091316</b> |
|                      | 333                 | ND674              | <i>Morganella morgani</i> A7-39                | 99.5 | 0        | 0      | 0                 | 47          | 0.0078034        |
| <b>67</b>            |                     |                    |                                                |      |          |        |                   | <b>55</b>   | <b>0.0091316</b> |

Table S1: Nearest cpnDB neighbours and relative abundance of deep sequencing OTU (ND), library clones (NC) and isolates (N)

| Cluster <sup>1</sup> | Branch <sup>2</sup> | Label <sup>3</sup> | Nearest Neighbour <sup>4</sup>          | %ID  | Isolates | Clones | % of total clones | Reads        | % of total reads |
|----------------------|---------------------|--------------------|-----------------------------------------|------|----------|--------|-------------------|--------------|------------------|
|                      | 334                 | ND653              | <i>Klebsiella pneumoniae</i> ATCC 13884 | 96   | 0        | 0      | 0                 | 11           | 0.0018263        |
|                      | 335                 | N110               | <i>Klebsiella pneumoniae</i> ATCC 13884 | 99.6 | 1        | 0      | 0                 | 2078         | 0.3450096        |
| <b>68</b>            |                     |                    |                                         |      | <b>1</b> |        |                   | <b>2089</b>  | <b>0.346836</b>  |
|                      | 336                 | ND499              | <i>Escherichia coli</i> MS 21-1         | 99.5 | 0        | 0      | 0                 | 24           | 0.0039847        |
|                      | 337                 | ND491              | <i>Escherichia coli</i> MS 21-1         | 99.5 | 0        | 0      | 0                 | 52           | 0.0086335        |
|                      | 338                 | ND289              | <i>Escherichia coli</i> MS 21-1         | 99.5 | 0        | 0      | 0                 | 429          | 0.0712267        |
|                      | 339                 | ND040              | <i>Escherichia coli</i> MS 21-1         | 99.5 | 0        | 0      | 0                 | 21           | 0.0034866        |
|                      | 340                 | N098               | <i>Escherichia coli</i> MS 198-1        | 100  | 2        | 0      | 0                 | 46470        | 7.7153986        |
|                      | 341                 | ND072              | <i>Escherichia coli</i> MS 21-1         | 99.5 | 0        | 0      | 0                 | 470          | 0.0780339        |
|                      | 342                 | ND281              | <i>Escherichia coli</i> ATCC 700336     | 99   | 0        | 0      | 0                 | 27           | 0.0044828        |
|                      | 343                 | ND805              | <i>Escherichia coli</i> MS 21-1         | 99.5 | 0        | 0      | 0                 | 6            | 0.0009962        |
|                      | 344                 | ND064              | <i>Escherichia coli</i> K12             | 100  | 0        | 0      | 0                 | 3488         | 0.5791115        |
|                      | 345                 | ND698              | <i>Escherichia coli</i> K12             | 99.5 | 0        | 0      | 0                 | 13           | 0.0021584        |
| <b>69</b>            |                     |                    |                                         |      | <b>2</b> |        |                   | <b>51000</b> | <b>8.467513</b>  |
|                      | 346                 | ND088              | <i>Porphyromonas uenonis</i> JCM 13868  | 98.5 | 0        | 0      | 0                 | 3            | 0.0004981        |
|                      | 347                 | ND425              | <i>Porphyromonas uenonis</i> JCM 13868  | 97.5 | 0        | 0      | 0                 | 143          | 0.0237422        |
|                      | 348                 | ND151              | <i>Porphyromonas uenonis</i> JCM 13868  | 99.5 | 0        | 0      | 0                 | 74           | 0.0122862        |
|                      | 349                 | ND503              | <i>Porphyromonas uenonis</i> JCM 13868  | 99   | 0        | 0      | 0                 | 2            | 0.0003321        |
|                      | 350                 | ND257              | <i>Porphyromonas uenonis</i> JCM 13868  | 99   | 0        | 0      | 0                 | 225          | 0.0373567        |
|                      | 351                 | NC035              | <i>Porphyromonas uenonis</i> JCM 13868  | 99   | 0        | 3      | 0.041958          | 6473         | 1.07471          |
|                      | 352                 | ND315              | <i>Porphyromonas uenonis</i> JCM 13868  | 97.5 | 0        | 0      | 0                 | 1871         | 0.3106415        |
|                      | 353                 | NC117              | <i>Porphyromonas uenonis</i> JCM 13868  | 98.2 | 0        | 34     | 0.4755245         | 0            | 0                |
|                      | 354                 | ND104              | <i>Porphyromonas uenonis</i> JCM 13868  | 98   | 0        | 0      | 0                 | 2176         | 0.3612806        |
|                      | 355                 | NC123              | <i>Porphyromonas uenonis</i> JCM 13868  | 97.5 | 0        | 1      | 0.013986          | 0            | 0                |
|                      | 356                 | NC126              | <i>Porphyromonas uenonis</i> JCM 13868  | 98.4 | 0        | 3      | 0.041958          | 0            | 0                |

Table S1: Nearest cpnDB neighbours and relative abundance of deep sequencing OTU (ND), library clones (NC) and isolates (N)

| Cluster <sup>1</sup> | Branch <sup>2</sup> | Label <sup>3</sup> | Nearest Neighbour <sup>4</sup>                | %ID  | Isolates | Clones    | % of total clones | Reads        | % of total reads |
|----------------------|---------------------|--------------------|-----------------------------------------------|------|----------|-----------|-------------------|--------------|------------------|
|                      | 357                 | ND469              | <i>Porphyromonas uenonis</i> JCM 13868        | 96   | 0        | 0         | 0                 | 6            | 0.0009962        |
|                      | 358                 | ND468              | <i>Porphyromonas asaccharolytica</i> JCM 6326 | 97.5 | 0        | 0         | 0                 | 14           | 0.0023244        |
| <b>70</b>            |                     |                    |                                               |      |          | <b>41</b> | <b>0.5734266</b>  | <b>10987</b> | <b>1.8241679</b> |
|                      | 359                 | ND504              | No near neighbour                             | <85  | 0        | 0         | 0                 | 70           | 0.0116221        |
| <b>71</b>            |                     |                    |                                               |      |          |           |                   | <b>70</b>    | <b>0.0116221</b> |
|                      | 360                 | NC148              | No near neighbour                             | <85  | 0        | 1         | 0.013986          | 0            | 0                |
| <b>72</b>            |                     |                    |                                               |      |          | <b>1</b>  | <b>0.013986</b>   |              |                  |
|                      | 361                 | NC159              | No near neighbour                             | <85  | 0        | 3         | 0.041958          | 0            | 0                |
| <b>73</b>            |                     |                    |                                               |      |          | <b>3</b>  | <b>0.041958</b>   |              |                  |
|                      | 362                 | ND574              | <i>Bacteroides forsythus</i> ATCC 43037       | 99   | 0        | 0         | 0                 | 69           | 0.011456         |
| <b>74</b>            |                     |                    |                                               |      |          |           |                   | <b>69</b>    | <b>0.011456</b>  |
|                      | 363                 | ND651              | <i>Porphyromonas gingivalis</i> ATCC 33277    | 100  | 0        | 0         | 0                 | 28           | 0.0046488        |
| <b>75</b>            |                     |                    |                                               |      |          |           |                   | <b>28</b>    | <b>0.0046488</b> |
|                      | 364                 | ND632              | No near neighbour                             | <85  | 0        | 0         | 0                 | 1            | 0.000166         |
| <b>76</b>            |                     |                    |                                               |      |          |           |                   | <b>1</b>     | <b>0.000166</b>  |
|                      | 365                 | ND834              | No near neighbour                             | <85  | 0        | 0         | 0                 | 48           | 0.0079694        |
| <b>77</b>            |                     |                    |                                               |      |          |           |                   | <b>48</b>    | <b>0.0079694</b> |
|                      | 366                 | ND069              | <i>Prevotella bivia</i> JCVIHMP010            | 100  | 0        | 0         | 0                 | 101          | 0.016769         |
|                      | 367                 | N114               | <i>Prevotella bivia</i> JCM 6332              | 99.8 | 2        | 0         | 0                 | 0            | 0                |
|                      | 368                 | NC121              | <i>Prevotella bivia</i> JCVIHMP010            | 99.3 | 0        | 31        | 0.4335664         | 0            | 0                |
|                      | 369                 | NC161              | <i>Prevotella bivia</i> JCVIHMP010            | 92.3 | 0        | 1         | 0.013986          | 0            | 0                |
| <b>78</b>            |                     |                    |                                               |      | <b>2</b> | <b>32</b> | <b>0.4475524</b>  | <b>101</b>   | <b>0.016769</b>  |
|                      | 370                 | ND880              | <i>Prevotella amnii</i> JCM 14753             | 98.5 | 0        | 0         | 0                 | 1109         | 0.1841269        |
|                      | 371                 | NC037              | <i>Prevotella amnii</i> JCM 14753             | 100  | 0        | 10        | 0.1398601         | 3190         | 0.5296346        |
|                      | 372                 | NC175              | <i>Prevotella melaninogenica</i> D18          | 92.1 | 0        | 2         | 0.027972          | 0            | 0                |



Table S1: Nearest cpnDB neighbours and relative abundance of deep sequencing OTU (ND), library clones (NC) and isolates (N)

| Cluster <sup>1</sup> | Branch <sup>2</sup> | Label <sup>3</sup> | Nearest Neighbour <sup>4</sup>                | %ID  | Isolates | Clones    | % of total clones | Reads        | % of total reads |
|----------------------|---------------------|--------------------|-----------------------------------------------|------|----------|-----------|-------------------|--------------|------------------|
| <b>79</b>            |                     |                    |                                               |      |          | <b>12</b> | <b>0.1678322</b>  | <b>4299</b>  | <b>0.7137615</b> |
|                      | 373                 | ND485              | <i>Prevotella corporis</i> JCM 8529           | 100  | 0        | 0         | 0                 | 121          | 0.0200896        |
|                      | 374                 | N083               | <i>Prevotella disiens</i> ATCC 29426          | 99.1 | 1        | 0         | 0                 | 38           | 0.0063091        |
|                      | 375                 | ND453              | <i>Prevotella bergensis</i> JCM 13869         | 98.5 | 0        | 0         | 0                 | 2            | 0.0003321        |
| <b>80</b>            |                     |                    |                                               |      | <b>1</b> |           |                   | <b>161</b>   | <b>0.0267308</b> |
|                      | 376                 | ND181              | No near neighbour                             | <85  | 0        | 0         | 0                 | 33           | 0.005479         |
|                      | 377                 | NC115              | No near neighbour                             | <85  | 0        | 79        | 1.1048951         | 0            | 0                |
|                      | 378                 | ND150              | No near neighbour                             | <85  | 0        | 0         | 0                 | 4804         | 0.7976065        |
|                      | 379                 | NC162              | No near neighbour                             | <85  | 0        | 1         | 0.013986          | 0            | 0                |
| <b>81</b>            |                     |                    |                                               |      |          | <b>80</b> | <b>1.1188811</b>  | <b>4837</b>  | <b>0.8030855</b> |
|                      | 380                 | NC020              | <i>Prevotella melaninogenica</i> D18          | 98.6 | 0        | 76        | 1.0629371         | 8564         | 1.4218781        |
|                      | 381                 | NC043              | <i>Prevotella melaninogenica</i> D18          | 96   | 0        | 1         | 0.013986          | 0            | 0                |
|                      | 382                 | ND384              | <i>Prevotella zooglyphiformans</i> ATCC 33285 | 99   | 0        | 0         | 0                 | 1500         | 0.2490445        |
|                      | 383                 | N090               | <i>Bacteroides fragilis</i> ATCC 25285        | 100  | 2        | 0         | 0                 | 0            | 0                |
| <b>82</b>            |                     |                    |                                               |      | <b>2</b> | <b>77</b> | <b>1.0769231</b>  | <b>10064</b> | <b>1.6709226</b> |
|                      | 384                 | ND182              | <i>Prevotella buccalis</i> ATCC 35310         | 96   | 0        | 0         | 0                 | 564          | 0.0936407        |
|                      | 385                 | NC023              | <i>Prevotella buccalis</i> ATCC 35310         | 97   | 0        | 11        | 0.1538462         | 0            | 0                |
|                      | 386                 | NC129              | <i>Prevotella buccalis</i> ATCC 35310         | 96   | 0        | 5         | 0.0699301         | 0            | 0                |
|                      | 387                 | ND718              | <i>Prevotella buccalis</i> ATCC 35310         | 96   | 0        | 0         | 0                 | 374          | 0.0620951        |
|                      | 388                 | ND271              | <i>Prevotella buccalis</i> ATCC 35310         | 96.5 | 0        | 0         | 0                 | 62           | 0.0102938        |
|                      | 389                 | ND256              | <i>Prevotella buccalis</i> ATCC 35310         | 96.5 | 0        | 0         | 0                 | 482          | 0.0800263        |
|                      | 390                 | ND450              | <i>Prevotella buccalis</i> ATCC 35310         | 97.5 | 0        | 0         | 0                 | 35           | 0.005811         |
| <b>83</b>            |                     |                    |                                               |      |          | <b>16</b> | <b>0.2237762</b>  | <b>1517</b>  | <b>0.251867</b>  |
|                      | 391                 | NC163              | <i>Prevotella timonensis</i> CRIS 5C-B1       | 94.1 | 0        | 1         | 0.013986          | 0            | 0                |
|                      | 392                 | NC170              | <i>Prevotella timonensis</i> CRIS 5C-B1       | 92.8 | 0        | 2         | 0.027972          | 0            | 0                |

Table S1: Nearest cpnDB neighbours and relative abundance of deep sequencing OTU (ND), library clones (NC) and isolates (N)

| Cluster <sup>1</sup> | Branch <sup>2</sup> | Label <sup>3</sup> | Nearest Neighbour <sup>4</sup>          | %ID  | Isolates | Clones     | % of total clones | Reads       | % of total reads |
|----------------------|---------------------|--------------------|-----------------------------------------|------|----------|------------|-------------------|-------------|------------------|
|                      | 393                 | NC125              | <i>Prevotella buccalis</i> ATCC 35310   | 90.7 | 0        | 179        | 2.5034965         | 0           | 0                |
|                      | 394                 | NC149              | <i>Prevotella buccalis</i> ATCC 35310   | 90.7 | 0        | 1          | 0.013986          | 0           | 0                |
|                      | 395                 | ND420              | <i>Prevotella buccalis</i> ATCC 35310   | 88   | 0        | 0          | 0                 | 5338        | 0.8862664        |
|                      | 396                 | NC166              | <i>Prevotella buccalis</i> ATCC 35310   | 89.4 | 0        | 89         | 1.2447552         | 0           | 0                |
| <b>84</b>            |                     |                    |                                         |      |          | <b>272</b> | <b>3.8041958</b>  | <b>5338</b> | <b>0.8862664</b> |
|                      | 397                 | NC169              | No near neighbour                       | <85  | 0        | 2          | 0.027972          | 0           | 0                |
|                      | 398                 | ND728              | <i>Prevotella timonensis</i> CRIS 5C-B1 | 99   | 0        | 0          | 0                 | 1           | 0.000166         |
|                      | 399                 | ND287              | <i>Prevotella timonensis</i> CRIS 5C-B1 | 100  | 0        | 0          | 0                 | 203         | 0.033704         |
|                      | 400                 | ND426              | <i>Prevotella timonensis</i> CRIS 5C-B1 | 99.5 | 0        | 0          | 0                 | 28237       | 4.6881797        |
|                      | 401                 | NC160              | <i>Prevotella buccalis</i> ATCC 35310   | 90.7 | 0        | 4          | 0.0559441         | 0           | 0                |
|                      | 402                 | NC165              | <i>Prevotella buccalis</i> ATCC 35310   | 88.5 | 0        | 1          | 0.013986          | 0           | 0                |
|                      | 403                 | NC167              | <i>Prevotella timonensis</i> CRIS 5C-B1 | 95.7 | 0        | 83         | 1.1608392         | 0           | 0                |
|                      | 404                 | ND100              | <i>Prevotella timonensis</i> CRIS 5C-B1 | 99   | 0        | 0          | 0                 | 161         | 0.0267308        |
|                      | 405                 | ND282              | <i>Prevotella timonensis</i> CRIS 5C-B1 | 96.5 | 0        | 0          | 0                 | 9           | 0.0014943        |
|                      | 406                 | ND684              | <i>Prevotella timonensis</i> JCM 15640  | 96   | 0        | 0          | 0                 | 15          | 0.0024904        |
|                      | 407                 | ND050              | <i>Prevotella timonensis</i> JCM 15640  | 96.5 | 0        | 0          | 0                 | 605         | 0.1004479        |
|                      | 408                 | ND762              | <i>Prevotella timonensis</i> JCM 15640  | 97.5 | 0        | 0          | 0                 | 34          | 0.005645         |
|                      | 409                 | ND681              | <i>Prevotella timonensis</i> JCM 15640  | 99   | 0        | 0          | 0                 | 56          | 0.0092977        |
|                      | 410                 | ND103              | <i>Prevotella timonensis</i> JCM 15640  | 97   | 0        | 0          | 0                 | 3523        | 0.5849225        |
|                      | 411                 | ND313              | <i>Prevotella timonensis</i> JCM 15640  | 98   | 0        | 0          | 0                 | 1932        | 0.3207693        |
|                      | 412                 | ND741              | <i>Prevotella timonensis</i> JCM 15640  | 97.5 | 0        | 0          | 0                 | 8           | 0.0013282        |
|                      | 413                 | NC078              | <i>Prevotella timonensis</i> CRIS 5C-B1 | 98.4 | 0        | 194        | 2.7132867         | 0           | 0                |
|                      | 414                 | ND737              | <i>Prevotella timonensis</i> JCM 15640  | 97.5 | 0        | 0          | 0                 | 16          | 0.0026565        |
|                      | 415                 | ND122              | <i>Prevotella timonensis</i> JCM 15640  | 98   | 0        | 0          | 0                 | 8           | 0.0013282        |
|                      | 416                 | ND051              | <i>Prevotella timonensis</i> JCM 15640  | 98   | 0        | 0          | 0                 | 10          | 0.0016603        |

Table S1: Nearest cpnDB neighbours and relative abundance of deep sequencing OTU (ND), library clones (NC) and isolates (N)

| Cluster <sup>1</sup> | Branch <sup>2</sup> | Label <sup>3</sup> | Nearest Neighbour <sup>4</sup>         | %ID  | Isolates | Clones     | % of total clones | Reads        | % of total reads |
|----------------------|---------------------|--------------------|----------------------------------------|------|----------|------------|-------------------|--------------|------------------|
|                      | 417                 | ND305              | <i>Prevotella timonensis</i> JCM 15640 | 98.5 | 0        | 0          | 0                 | 17912        | 2.9739234        |
|                      | 418                 | ND403              | <i>Prevotella timonensis</i> JCM 15640 | 98   | 0        | 0          | 0                 | 82           | 0.0136144        |
|                      | 419                 | ND331              | <i>Prevotella timonensis</i> JCM 15640 | 97.5 | 0        | 0          | 0                 | 25           | 0.0041507        |
|                      | 420                 | ND472              | <i>Prevotella timonensis</i> JCM 15640 | 98   | 0        | 0          | 0                 | 5            | 0.0008301        |
| <b>85</b>            |                     |                    |                                        |      |          | <b>282</b> | <b>3.9440559</b>  | <b>52842</b> | <b>8.7733396</b> |

<sup>1</sup> Clusters of branches summarized in circles at branch ends in Fig. 1; <sup>2</sup> All branches of Fig. 1 phylogeny shown clockwise from bottom left;

<sup>3</sup> N=Nairobi isolate, NC=Nairobi clone, ND=Nairobi deep sequencing OTU; <sup>4</sup> Nearest neighbour in cpnDB.

Table S2: Most frequently detected operational taxonomic units by abundance of reads detected

| Rank | OTU <sup>1</sup> | Nearest neighbour <sup>2</sup>      | Proportion of reads |         | Proportion of group |         |
|------|------------------|-------------------------------------|---------------------|---------|---------------------|---------|
|      |                  |                                     | # reads             | % total | # colonized         | % total |
| 1    | ND348            | <i>Escherichia coli</i> 100%        | 46470               | 7.70    | 20                  | 45      |
| 2    | ND175            | <i>Megasphaera sp.</i> 99.6%        | 42076               | 6.97    | 31                  | 70      |
| 3    | ND255            | <i>Lactobacillus iners</i> 98.9%    | 40617               | 6.73    | 40                  | 91      |
| 4    | ND393            | <i>Gardnerella vaginalis</i> 87%    | 29972               | 4.97    | 23                  | 52      |
| 5    | ND426            | <i>Prevotella timonensis</i> 99.5%  | 28237               | 4.68    | 26                  | 59      |
| 6    | ND320            | <i>Lactobacillus crispatus</i> 100% | 27717               | 4.59    | 21                  | 48      |
| 7    | ND254            | <i>Gardnerella vaginalis</i> 90.2%  | 27641               | 4.58    | 24                  | 55      |
| 8    | ND317            | No near neighbour (NC053)           | 26090               | 4.32    | 31                  | 70      |
| 9    | ND316            | <i>Gardnerella vaginalis</i> 97%    | 20713               | 3.43    | 35                  | 80      |
| 10   | ND252            | <i>Gardnerella vaginalis</i> 88.9%  | 20350               | 3.37    | 37                  | 84      |

<sup>1</sup> OTU: Operational taxonomic unit, ND: Nairobi deep sequencing OTU; <sup>2</sup> Nearest neighbour in cpnDB

Table S3: Most frequently detected operational taxonomic units by proportion of group colonized

| Rank | OTU <sup>1</sup> | Nearest neighbour <sup>2</sup>      | Proportion of group |         | Proportion of reads |         |
|------|------------------|-------------------------------------|---------------------|---------|---------------------|---------|
|      |                  |                                     | # colonized         | % total | # reads             | % total |
| 1    | ND263            | <i>Gardnerella vaginalis</i> 90%    | 40                  | 91      | 11862               | 1.97    |
| 1    | ND255            | <i>Lactobacillus iners</i> 98.9%    | 40                  | 91      | 40617               | 6.73    |
| 2    | ND237            | No near neighbour (NC040)           | 39                  | 89      | 13608               | 2.25    |
| 2    | ND253            | <i>Variovorax paradoxus</i> 98%     | 39                  | 89      | 7110                | 1.18    |
| 3    | ND252            | <i>Gardnerella vaginalis</i> 88.9%  | 37                  | 84      | 20350               | 3.37    |
| 4    | ND038            | <i>Sphingobium japonicum</i> 89.5%  | 36                  | 82      | 1588                | 0.26    |
| 4    | ND427            | <i>Comamonas terrigena</i> 88%      | 36                  | 82      | 1202                | 0.20    |
| 5    | ND316            | <i>Gardnerella vaginalis</i> 97%    | 35                  | 80      | 20713               | 3.43    |
| 6    | ND317            | No near neighbour (NC053)           | 31                  | 70      | 26090               | 4.32    |
| 6    | ND175            | <i>Megasphaera sp.</i> 99.6%        | 31                  | 70      | 42076               | 6.97    |
| 6    | ND246            | <i>Lactobacillus iners</i> 98.5%    | 31                  | 70      | 17730               | 2.94    |
| 7    | ND313            | <i>Prevotella timonensis</i> 98%    | 30                  | 68      | 1932                | 0.32    |
| 8    | ND435            | No near neighbour (NC040)           | 27                  | 61      | 176                 | 0.03    |
| 8    | ND307            | <i>Lactobacillus sp. N6</i> 100%    | 27                  | 61      | 13057               | 2.16    |
| 9    | ND231            | <i>Gardnerella vaginalis</i> 100%   | 26                  | 59      | 11869               | 1.97    |
| 9    | ND426            | <i>Prevotella timonensis</i> 99.5%  | 26                  | 59      | 28237               | 4.68    |
| 9    | ND375            | No near neighbour (NC040)           | 26                  | 59      | 161                 | 0.03    |
| 10   | ND404            | <i>Gardnerella vaginalis</i> 98%    | 25                  | 57      | 8938                | 1.48    |
| 10   | ND305            | <i>Prevotella timonensis</i> 98.5%  | 25                  | 57      | 17815               | 2.95    |
| 10   | ND857            | <i>Sphingomonas wittichii</i> 92.5% | 25                  | 57      | 417                 | 0.07    |

<sup>1</sup> OTU: Operational taxonomic unit, ND: Nairobi deep sequencing OTU; <sup>2</sup> Nearest neighbour in cpnDB

Table S4: Distribution of operational taxonomic units by HIV serostatus and significance testing

| Row <sup>1</sup> | OTU <sup>2</sup> | Nearest neighbour <sup>3</sup>              | % colonized |       |      | Median Tier <sup>4</sup> |       |      | Significance 1 (p) <sup>5</sup> |         |         | Significance 2 (p) <sup>6</sup> |      |        |
|------------------|------------------|---------------------------------------------|-------------|-------|------|--------------------------|-------|------|---------------------------------|---------|---------|---------------------------------|------|--------|
|                  |                  |                                             | HESN        | HIV-N | HIV+ | HESN                     | HIV-N | HIV+ | HESN/N                          | N/+     | HESN/+  | HESN/N                          | N/+  | HESN/+ |
| 1                | ND348            | <i>Escherichia coli</i> 100%                | 25          | 25    | 100  | 5                        | 5     | 2    |                                 | 0.00004 | 0.00008 |                                 |      |        |
| 2                | ND765            | <i>Comamonas terrigena</i> 91%              | 50          | 44    | 8    | 4.5                      | 5     | 5    |                                 | 0.03    | 0.02    |                                 |      |        |
| 3                | ND713            | No near neighbour <85%                      | 43          | 25    | 0    | 5                        | 5     | 5    |                                 |         | 0.01    |                                 |      |        |
| 4                | ND427            | <i>Comamonas terrigena</i> 88%              | 93          | 69    | 83   | 3                        | 3     | 3    |                                 |         |         |                                 |      |        |
| 5                | ND251            | <i>Bradyrhizobium japonicum</i> 90%         | 37          | 25    | 42   | 5                        | 5     | 5    |                                 |         |         |                                 |      |        |
| 6                | ND670            | <i>Variovorax paradoxus</i> 98%             | 43          | 38    | 33   | 5                        | 5     | 5    |                                 |         |         |                                 |      |        |
| 7                | ND326            | <i>Variovorax paradoxus</i> 98%             | 62          | 25    | 42   | 3.5                      | 5     | 5    |                                 |         |         |                                 |      |        |
| 8                | ND253            | <i>Variovorax paradoxus</i> 98%             | 87          | 94    | 83   | 2                        | 2     | 2    |                                 |         |         |                                 |      |        |
| 9                | ND308            | No near neighbour <85%                      | 56          | 31    | 50   | 3                        | 5     | 4.5  |                                 |         |         |                                 |      |        |
| 10               | ND057            | <i>Methylobacterium radiotolerans</i> 98.5% | 37          | 31    | 50   | 5                        | 5     | 4.5  |                                 |         |         |                                 |      |        |
| 11               | ND559            | <i>Mesorhizobium opportunistum</i> 87.5%    | 43          | 31    | 58   | 5                        | 5     | 4    |                                 |         |         |                                 |      |        |
| 12               | ND614            | <i>Rhodopseudomonas palustris</i> 92.5%     | 25          | 25    | 42   | 5                        | 5     | 5    |                                 |         |         |                                 |      |        |
| 13               | ND389            | <i>Sphingomonas wittichii</i> 92.5%         | 6           | 44    | 25   | 5                        | 5     | 5    | 0.02                            |         |         |                                 |      |        |
| 14               | ND658            | <i>Sphingomonas wittichii</i> 89.5%         | 43          | 50    | 75   | 5                        | 4.5   | 3.5  |                                 |         |         |                                 |      |        |
| 15               | ND857            | <i>Sphingomonas wittichii</i> 92.5%         | 56          | 44    | 75   | 3                        | 5     | 3    |                                 |         |         |                                 |      |        |
| 16               | ND038            | <i>Sphingobium japonicum</i> 89.5%          | 87          | 75    | 83   | 2.5                      | 3     | 2.5  |                                 |         |         |                                 |      |        |
| 17               | ND401            | <i>Lactobacillus jensenii</i> 95%           | 25          | 44    | 8    | 5                        | 5     | 5    |                                 | 0.03    |         |                                 |      |        |
| 18               | ND439            | <i>Lactobacillus jensenii</i> 100%          | 25          | 69    | 25   | 5                        | 4     | 5    | 0.04                            | 0.04    |         |                                 |      |        |
| 19               | ND296            | <i>Lactobacillus crispatus</i> 100%         | 25          | 44    | 0    | 5                        | 5     | 5    |                                 | 0.01    |         |                                 |      |        |
| 20               | ND320            | <i>Lactobacillus crispatus</i> 100%         | 50          | 75    | 8    | 4.5                      | 3     | 5    |                                 | 0.001   | 0.03    |                                 |      |        |
| 21               | ND085            | <i>Lactobacillus iners</i> 99%              | 37          | 31    | 42   | 5                        | 5     | 5    |                                 |         |         |                                 | 0.03 |        |
| 22               | ND294            | <i>Lactobacillus iners</i> 99%              | 37          | 44    | 17   | 5                        | 5     | 5    |                                 |         |         |                                 |      |        |
| 23               | ND295            | <i>Lactobacillus iners</i> 98.2%            | 25          | 44    | 17   | 5                        | 5     | 5    |                                 |         |         |                                 |      |        |
| 24               | ND019            | <i>Lactobacillus iners</i> 99%              | 37          | 38    | 33   | 5                        | 5     | 5    |                                 |         |         |                                 |      |        |
| 25               | ND877            | <i>Lactobacillus iners</i> 98.9%            | 43          | 44    | 58   | 5                        | 5     | 4    |                                 |         |         |                                 |      |        |
| 26               | ND284            | <i>Lactobacillus iners</i> 98.2%            | 37          | 44    | 50   | 5                        | 5     | 4.5  |                                 |         |         |                                 |      |        |
| 27               | ND246            | <i>Lactobacillus iners</i> 98.5%            | 75          | 50    | 92   | 3                        | 4.5   | 2    | 0.05                            | 0.006   |         |                                 |      |        |
| 28               | ND255            | <i>Lactobacillus iners</i> 98.9%            | 87          | 94    | 92   | 2.5                      | 2     | 2    |                                 |         |         |                                 |      |        |
| 29               | ND303            | <i>Lactobacillus sp. N6</i> 98.9%           | 37          | 44    | 8    | 5                        | 5     | 5    |                                 |         |         |                                 |      |        |
| 30               | ND307            | <i>Lactobacillus sp. N6</i> 100%            | 68          | 69    | 42   | 3                        | 3.5   | 5    |                                 |         |         |                                 |      |        |
| 31               | ND032            | No near neighbours                          | 25          | 63    | 50   | 5                        | 4     | 4.5  |                                 |         |         |                                 |      |        |
| 32               | ND089            | No near neighbour (NC039)                   | 37          | 25    | 8    | 5                        | 5     | 5    |                                 |         |         |                                 |      |        |
| 33               | ND278            | No near neighbour (NC039)                   | 37          | 31    | 17   | 5                        | 5     | 5    |                                 |         |         |                                 |      |        |
| 34               | ND398            | No near neighbour (NC039)                   | 56          | 44    | 42   | 4                        | 5     | 5    |                                 |         |         |                                 |      |        |
| 35               | ND291            | No near neighbour (NC039)                   | 43          | 56    | 33   | 5                        | 4     | 5    |                                 |         |         |                                 |      |        |
| 36               | ND360            | <i>Megasphaera sp.</i> 99.5%                | 25          | 25    | 33   | 5                        | 5     | 5    |                                 |         |         |                                 |      |        |

Table S4: Distribution of operational taxonomic units by HIV serostatus and significance testing

| Row <sup>1</sup> | OTU <sup>2</sup> | Nearest neighbour <sup>3</sup>          | % colonized |       |      | Median Tier <sup>4</sup> |       |      | Significance 1 (p) <sup>5</sup> |       |        | Significance 2 (p) <sup>6</sup> |      |        |
|------------------|------------------|-----------------------------------------|-------------|-------|------|--------------------------|-------|------|---------------------------------|-------|--------|---------------------------------|------|--------|
|                  |                  |                                         | HESN        | HIV-N | HIV+ | HESN                     | HIV-N | HIV+ | HESN/N                          | N/+   | HESN/+ | HESN/N                          | N/+  | HESN/+ |
| 37               | ND044            | No near neighbour (NC040)               | 50          | 63    | 50   | 4.5                      | 4     | 4.5  |                                 |       |        |                                 |      |        |
| 38               | ND375            | No near neighbour (NC040)               | 56          | 69    | 50   | 4                        | 4     | 4.5  |                                 |       |        |                                 |      |        |
| 39               | ND435            | No near neighbour (NC040)               | 56          | 69    | 58   | 3.5                      | 3     | 4    |                                 |       |        |                                 |      |        |
| 40               | ND237            | No near neighbour (NC040)               | 93          | 94    | 75   | 2                        | 1.5   | 2    |                                 |       |        |                                 |      |        |
| 41               | ND084            | <i>Megasphaera sp.</i> 99.5%            | 25          | 31    | 25   | 5                        | 5     | 5    |                                 |       |        |                                 |      |        |
| 42               | ND318            | <i>Megasphaera sp.</i> 99.5%            | 25          | 44    | 58   | 5                        | 5     | 3.5  |                                 |       |        |                                 |      |        |
| 43               | ND175            | <i>Megasphaera sp.</i> 99.6%            | 68          | 63    | 83   | 3                        | 3     | 3    |                                 |       |        |                                 |      |        |
| 44               | ND286            | No near neighbour (NC053)               | 18          | 44    | 17   | 5                        | 5     | 5    |                                 |       |        |                                 |      |        |
| 45               | ND344            | No near neighbour (NC053)               | 25          | 38    | 8    | 5                        | 5     | 5    |                                 |       |        |                                 |      |        |
| 46               | ND288            | No near neighbour (NC053)               | 18          | 38    | 17   | 5                        | 5     | 5    |                                 |       |        |                                 | 0.05 |        |
| 47               | ND059            | No near neighbour (NC053)               | 50          | 31    | 50   | 4.5                      | 5     | 4    |                                 |       |        |                                 |      |        |
| 48               | ND317            | No near neighbour (NC053)               | 62          | 81    | 67   | 4                        | 2     | 3.5  |                                 |       |        | 0.04                            |      |        |
| 49               | ND257            | <i>Porphyromonas uenonis</i> 99%        | 18          | 50    | 8    | 5                        | 4.5   | 5    |                                 | 0.02  |        |                                 |      |        |
| 50               | ND315            | <i>Porphyromonas uenonis</i> 97.5%      | 6           | 63    | 0    | 5                        | 3.5   | 5    | 0.001                           | 0.001 |        |                                 |      |        |
| 51               | ND297            | <i>Porphyromonas uenonis</i> 99%        | 18          | 69    | 42   | 5                        | 3     | 5    | 0.01                            | 0.02  |        |                                 | 0.03 | 0.02   |
| 52               | ND069            | <i>Prevotella bivia</i> 100%            | 18          | 13    | 50   | 5                        | 5     | 4.5  |                                 | 0.02  | 0.04   |                                 |      | 0.03   |
| 53               | ND023            | <i>Prevotella amnii</i> 100%            | 43          | 50    | 50   | 5                        | 4     | 4.5  |                                 |       |        |                                 |      |        |
| 54               | ND429            | <i>Prevotella melaninogenica</i> 98.6%  | 62          | 31    | 17   | 3.5                      | 5     | 5    |                                 |       | 0.03   |                                 |      |        |
| 55               | ND313            | <i>Prevotella timonensis</i> 98%        | 75          | 63    | 67   | 3                        | 3.5   | 3.5  |                                 |       |        |                                 |      |        |
| 56               | ND103            | <i>Prevotella timonensis</i> 97%        | 56          | 6     | 42   | 4                        | 5     | 5    | 0.005                           | 0.04  |        |                                 |      |        |
| 57               | ND305            | <i>Prevotella timonensis</i> 98.5%      | 81          | 50    | 33   | 3                        | 4.5   | 5    |                                 |       | 0.03   |                                 |      |        |
| 58               | ND426            | <i>Prevotella timonensis</i> 99.5%      | 31          | 75    | 75   | 5                        | 3     | 3    | 0.03                            |       |        |                                 |      |        |
| 59               | ND150            | No near neighbour (NC115)               | 31          | 50    | 33   | 5                        | 4.5   | 5    |                                 |       |        |                                 |      |        |
| 60               | ND256            | <i>Prevotella buccalis</i> 96.5%        | 25          | 19    | 33   | 5                        | 5     | 5    |                                 |       |        |                                 |      |        |
| 61               | ND182            | <i>Prevotella buccalis</i> 96%          | 12          | 44    | 17   | 5                        | 5     | 5    |                                 |       |        |                                 |      |        |
| 62               | ND420            | <i>Prevotella buccalis</i> 88%          | 31          | 50    | 33   | 5                        | 4.5   | 5    |                                 |       |        |                                 |      |        |
| 63               | ND406            | <i>Atopobium vaginae</i> 96.5%          | 18          | 31    | 25   | 5                        | 5     | 5    |                                 |       |        |                                 |      |        |
| 64               | ND106            | <i>Atopobium vaginae</i> 97%            | 31          | 50    | 50   | 5                        | 4.5   | 4.5  |                                 |       |        |                                 |      |        |
| 65               | ND010            | <i>Atopobium vaginae</i> 96.5%          | 56          | 25    | 17   | 4                        | 5     | 5    |                                 |       |        |                                 |      |        |
| 66               | ND484            | <i>Coryne. tuberculostearicum</i> 99.5% | 43          | 19    | 67   | 5                        | 5     | 3.5  |                                 | 0.006 |        |                                 |      |        |
| 67               | ND739            | No near neighbour <85%                  | 25          | 25    | 25   | 5                        | 5     | 5    |                                 |       |        |                                 | 0.05 |        |
| 68               | ND298            | <i>Gardnerella vaginalis</i> 100%       | 50          | 13    | 25   | 4.5                      | 5     | 5    | 0.04                            |       |        |                                 |      |        |
| 69               | ND231            | <i>Gardnerella vaginalis</i> 100%       | 81          | 25    | 75   | 3                        | 5     | 3    | 0.01                            | 0.04  |        |                                 |      |        |
| 70               | ND233            | <i>Gardnerella vaginalis</i> 98%        | 31          | 44    | 33   | 5                        | 5     | 5    |                                 |       |        |                                 |      |        |
| 71               | ND302            | <i>Gardnerella vaginalis</i> 97.5%      | 37          | 38    | 50   | 5                        | 5     | 4.5  |                                 |       |        |                                 |      |        |
| 72               | ND067            | <i>Gardnerella vaginalis</i> 97.5%      | 37          | 25    | 50   | 5                        | 5     | 4.5  |                                 |       |        |                                 |      |        |

Table S4: Distribution of operational taxonomic units by HIV serostatus and significance testing

| Row <sup>1</sup> | OTU <sup>2</sup> | Nearest neighbour <sup>3</sup>     | % colonized |       |      | Median Tier <sup>4</sup> |       |      | Significance 1 (p) <sup>5</sup> |        |        | Significance 2 (p) <sup>6</sup> |     |        |
|------------------|------------------|------------------------------------|-------------|-------|------|--------------------------|-------|------|---------------------------------|--------|--------|---------------------------------|-----|--------|
|                  |                  |                                    | HESN        | HIV-N | HIV+ | HESN                     | HIV-N | HIV+ | HESN/N                          | N/+    | HESN/+ | HESN/N                          | N/+ | HESN/+ |
| 73               | ND316            | <i>Gardnerella vaginalis</i> 97%   | 81          | 100   | 50   | 3                        | 3     | 4    |                                 | 0.02   | 0.03   |                                 |     |        |
| 74               | ND285            | <i>Gardnerella vaginalis</i> 98%   | 43          | 44    | 33   | 5                        | 5     | 5    |                                 |        |        |                                 |     |        |
| 75               | ND404            | <i>Gardnerella vaginalis</i> 98%   | 56          | 63    | 50   | 3                        | 3.5   | 4.5  |                                 |        |        |                                 |     |        |
| 76               | ND260            | <i>Gardnerella vaginalis</i> 96.5% | 18          | 56    | 58   | 5                        | 3.5   | 3    |                                 |        | 0.05   |                                 |     |        |
| 77               | ND102            | No near neighbour (NC070)          | 6           | 69    | 0    | 5                        | 3.5   | 5    | 0.0005                          | 0.0006 |        |                                 |     |        |
| 78               | ND301            | No near neighbour (N72)            | 31          | 25    | 17   | 5                        | 5     | 5    |                                 |        |        |                                 |     |        |
| 79               | ND304            | <i>Gardnerella vaginalis</i> 88.9% | 31          | 31    | 25   | 5                        | 5     | 5    |                                 |        |        |                                 |     |        |
| 80               | ND394            | <i>Gardnerella vaginalis</i> 88.9% | 37          | 31    | 17   | 5                        | 5     | 5    |                                 |        |        |                                 |     |        |
| 81               | ND252            | <i>Gardnerella vaginalis</i> 88.9% | 87          | 88    | 75   | 2.5                      | 3     | 3    |                                 |        |        |                                 |     |        |
| 82               | ND042            | <i>Gardnerella vaginalis</i> 89.1% | 43          | 25    | 33   | 5                        | 5     | 5    |                                 |        |        |                                 |     |        |
| 83               | ND061            | <i>Gardnerella vaginalis</i> 86.5% | 25          | 13    | 58   | 5                        | 5     | 4    |                                 | 0.02   |        |                                 |     |        |
| 84               | ND054            | <i>Gardnerella vaginalis</i> 90.9% | 25          | 44    | 33   | 5                        | 5     | 5    |                                 |        |        |                                 |     |        |
| 85               | ND436            | <i>Gardnerella vaginalis</i> 87.5% | 50          | 44    | 42   | 4.5                      | 5     | 5    |                                 |        |        |                                 |     |        |
| 86               | ND412            | <i>Gardnerella vaginalis</i> 88.9% | 43          | 19    | 25   | 5                        | 5     | 5    |                                 |        |        |                                 |     |        |
| 87               | ND328            | <i>Gardnerella vaginalis</i> 90%   | 37          | 25    | 33   | 5                        | 5     | 5    |                                 |        |        |                                 |     |        |
| 88               | ND263            | <i>Gardnerella vaginalis</i> 90%   | 93          | 94    | 83   | 3                        | 2.5   | 3    |                                 |        |        |                                 |     |        |
| 89               | ND393            | <i>Gardnerella vaginalis</i> 87%   | 37          | 81    | 33   | 5                        | 3     | 5    | 0.04                            | 0.02   |        |                                 |     |        |
| 90               | ND254            | <i>Gardnerella vaginalis</i> 90.2% | 75          | 38    | 50   | 4                        | 5     | 4.5  | 0.03                            |        |        |                                 |     |        |

<sup>1</sup> Row (from left to right) in Fig.3; <sup>2</sup> OTU: Operational taxonomic unit, ND: Nairobi deep sequencing OTU; <sup>3</sup> Nearest neighbour in cpnDB; <sup>4</sup> Median tier of abundance observed in each group (1=>1%, 2=0.1-0.99%, 3=0.01-0.099%, 4=0.001-0.0099%, 5=undetected); <sup>5</sup> Non-parametric test conducted in R, shaded cells indicate p value <0.05 after Bonferroni correction (p\*90 tests), <sup>6</sup> Non-parametric test conducted in Genespring, no p value <0.05 after correction for multiple comparisons, shaded cell indicates significance by both methods.



Table S5: Distribution of operational taxonomic units by molecular BV status and significance testing

| Row <sup>1</sup> | OTU <sup>2</sup> | Nearest neighbour <sup>3</sup>              | % colonized |      |     | Median Tier <sup>4</sup> |      |     | Significance 1 (p) <sup>5</sup> |          |         | Significance 2 (p) <sup>6</sup> |          |         |
|------------------|------------------|---------------------------------------------|-------------|------|-----|--------------------------|------|-----|---------------------------------|----------|---------|---------------------------------|----------|---------|
|                  |                  |                                             | BV+         | mBVI | BV- | BV+                      | mBVI | BV- | BV+/mBVI                        | BV-/mBVI | BV+/BV- | BV+/mBVI                        | BV-/mBVI | BV+/BV- |
| 1                | ND348            | <i>Escherichia coli</i> 100%                | 29          | 53   | 42  | 5                        | 4    | 5   |                                 |          |         |                                 |          |         |
| 2                | ND765            | <i>Comamonas terrigena</i> 91%              | 7           | 53   | 58  | 5                        | 3    | 4   | 0.03                            |          | 0.03    |                                 |          |         |
| 3                | ND713            | No near neighbour <85%                      | 7           | 40   | 33  | 5                        | 5    | 5   | 0.03                            |          |         |                                 |          |         |
| 4                | ND427            | <i>Comamonas terrigena</i> 88%              | 71          | 93   | 92  | 3                        | 3    | 2   | 0.005                           |          | 0.004   | 0.009                           |          | 0.02    |
| 5                | ND251            | <i>Bradyrhizobium japonicum</i> 90%         | 7           | 47   | 58  | 5                        | 5    | 4   |                                 |          | 0.007   |                                 |          |         |
| 6                | ND670            | <i>Variovorax paradoxus</i> 98%             | 7           | 53   | 67  | 5                        | 4    | 4   |                                 |          | 0.007   |                                 |          |         |
| 7                | ND326            | <i>Variovorax paradoxus</i> 98%             | 14          | 60   | 67  | 5                        | 3    | 3   | 0.03                            |          | 0.001   |                                 |          |         |
| 8                | ND253            | <i>Variovorax paradoxus</i> 98%             | 79          | 93   | 100 | 3                        | 2    | 1   | 0.003                           |          | 0.0004  | 0.001                           |          | 0.003   |
| 9                | ND308            | No near neighbour <85%                      | 36          | 40   | 67  | 5                        | 5    | 3   |                                 | 0.04     | 0.03    |                                 |          |         |
| 10               | ND057            | <i>Methylobacterium radiotolerans</i> 98.5% | 0           | 60   | 58  | 5                        | 4    | 3.5 | 0.02                            |          | 0.004   |                                 |          |         |
| 11               | ND559            | <i>Mesorhizobium opportunistum</i> 87.5%    | 14          | 60   | 58  | 5                        | 4    | 4   | 0.006                           |          | 0.003   |                                 |          |         |
| 12               | ND614            | <i>Rhodopseudomonas palustris</i> 92.5%     | 7           | 40   | 50  | 5                        | 5    | 4   |                                 |          | 0.03    |                                 |          |         |
| 13               | ND389            | <i>Sphingomonas wittichii</i> 92.5%         | 7           | 40   | 33  | 5                        | 5    | 5   |                                 |          |         |                                 |          |         |
| 14               | ND658            | <i>Sphingomonas wittichii</i> 89.5%         | 29          | 80   | 58  | 5                        | 3    | 3   | 0.03                            |          | 0.03    |                                 |          |         |
| 15               | ND857            | <i>Sphingomonas wittichii</i> 92.5%         | 21          | 80   | 75  | 5                        | 3    | 3   | 0.02                            |          | 0.003   |                                 |          |         |
| 16               | ND038            | <i>Sphingobium japonicum</i> 89.5%          | 71          | 93   | 92  | 3.5                      | 2    | 2   | 0.005                           |          | 0.002   | 0.01                            |          | 0.01    |
| 17               | ND401            | <i>Lactobacillus jensenii</i> 95%           | 29          | 33   | 25  | 5                        | 5    | 5   |                                 |          |         |                                 |          |         |
| 18               | ND439            | <i>Lactobacillus jensenii</i> 100%          | 50          | 33   | 42  | 4.5                      | 5    | 5   |                                 |          |         |                                 |          | 0.009   |
| 19               | ND296            | <i>Lactobacillus crispatus</i> 100%         | 29          | 20   | 33  | 5                        | 5    | 5   |                                 |          |         |                                 |          |         |
| 20               | ND320            | <i>Lactobacillus crispatus</i> 100%         | 64          | 27   | 58  | 3.5                      | 5    | 4   | 0.05                            |          |         |                                 |          |         |
| 21               | ND085            | <i>Lactobacillus iners</i> 99%              | 7           | 47   | 67  | 5                        | 5    | 3.5 |                                 | 0.04     | 0.002   |                                 |          |         |
| 22               | ND294            | <i>Lactobacillus iners</i> 99%              | 7           | 47   | 58  | 5                        | 5    | 3.5 |                                 |          | 0.02    |                                 |          |         |
| 23               | ND295            | <i>Lactobacillus iners</i> 98.2%            | 0           | 47   | 50  | 5                        | 5    | 4.5 | 0.01                            |          | 0.002   |                                 |          |         |
| 24               | ND019            | <i>Lactobacillus iners</i> 99%              | 7           | 47   | 67  | 5                        | 5    | 3   |                                 |          | 0.007   |                                 |          |         |
| 25               | ND877            | <i>Lactobacillus iners</i> 98.9%            | 14          | 60   | 83  | 5                        | 3    | 2.5 | 0.007                           | 0.04     | 0.0005  |                                 |          |         |
| 26               | ND284            | <i>Lactobacillus iners</i> 98.2%            | 7           | 60   | 75  | 5                        | 4    | 3   | 0.03                            |          | 0.0003  |                                 |          |         |
| 27               | ND246            | <i>Lactobacillus iners</i> 98.5%            | 57          | 73   | 75  | 4                        | 3    | 3   |                                 |          |         |                                 |          |         |
| 28               | ND255            | <i>Lactobacillus iners</i> 98.9%            | 93          | 87   | 100 | 3                        | 1    | 0.5 |                                 |          | 0.01    |                                 |          | 0.02    |
| 29               | ND303            | <i>Lactobacillus sp. N6</i> 98.9%           | 14          | 27   | 67  | 5                        | 5    | 2.5 |                                 | 0.01     | 0.002   |                                 |          |         |
| 30               | ND307            | <i>Lactobacillus sp. N6</i> 100%            | 50          | 67   | 83  | 4.5                      | 3    | 1.5 |                                 | 0.006    | 0.001   |                                 |          | 0.007   |
| 31               | ND032            | No near neighbour                           | 57          | 40   | 25  | 4                        | 5    | 5   |                                 |          |         |                                 |          |         |

Table S5: Distribution of operational taxonomic units by molecular BV status and significance testing

| Row <sup>1</sup> | OTU <sup>2</sup> | Nearest neighbour <sup>3</sup>         | % colonized |      |     | Median Tier <sup>4</sup> |      |     | Significance 1 (p) <sup>5</sup> |          |         | Significance 2 (p) <sup>6</sup> |          |         |
|------------------|------------------|----------------------------------------|-------------|------|-----|--------------------------|------|-----|---------------------------------|----------|---------|---------------------------------|----------|---------|
|                  |                  |                                        | BV+         | mBVI | BV- | BV+                      | mBVI | BV- | BV+/mBVI                        | BV-/mBVI | BV+/BV- | BV+/mBVI                        | BV-/mBVI | BV+/BV- |
| 32               | ND089            | No near neighbour (NC039)              | 71          | 7    | 0   | 3                        | 5    | 5   | 0.0004                          |          | 0.0003  |                                 |          |         |
| 33               | ND278            | No near neighbour (NC039)              | 86          | 7    | 0   | 3                        | 5    | 5   | 0.0001                          |          | 0.0003  |                                 |          |         |
| 34               | ND398            | No near neighbour (NC039)              | 86          | 27   | 33  | 2                        | 5    | 5   | 0.00008                         |          | 0.00004 |                                 |          | 0.005   |
| 35               | ND291            | No near neighbour (NC039)              | 93          | 27   | 17  | 3                        | 5    | 5   | 0.00003                         |          | 0.00006 | 0.009                           |          |         |
| 36               | ND360            | <i>Megasphaera sp.</i> 99.5%           | 50          | 7    | 33  | 4                        | 5    | 5   | 0.001                           | 0.03     |         |                                 |          |         |
| 37               | ND044            | No near neighbour (NC040)              | 86          | 53   | 17  | 4                        | 4    | 5   |                                 | 0.02     | 0.001   |                                 |          |         |
| 38               | ND375            | No near neighbour (NC040)              | 79          | 67   | 25  | 4                        | 3    | 5   |                                 | 0.008    | 0.006   |                                 |          |         |
| 39               | ND435            | No near neighbour (NC040)              | 100         | 60   | 17  | 3                        | 3    | 5   |                                 | 0.007    | 0.0006  |                                 |          |         |
| 40               | ND237            | No near neighbour (NC040)              | 100         | 80   | 83  | 1                        | 1    | 3   |                                 | 0.02     | 0.0002  |                                 | 0.04     | 0.001   |
| 41               | ND084            | <i>Megasphaera sp.</i> 99.5%           | 57          | 13   | 17  | 4                        | 5    | 5   | 0.0004                          |          | 0.02    |                                 |          |         |
| 42               | ND318            | <i>Megasphaera sp.</i> 99.5%           | 50          | 27   | 33  | 3.5                      | 5    | 5   | 0.006                           |          | 0.04    | 0.005                           |          |         |
| 43               | ND175            | <i>Megasphaera sp.</i> 99.6%           | 71          | 67   | 67  | 1.5                      | 3    | 3   | 0.004                           |          |         | 0.02                            |          |         |
| 44               | ND286            | No near neighbour (NC053)              | 57          | 20   | 0   | 3.5                      | 5    | 5   | 0.007                           |          | 0.0008  | 0.03                            |          |         |
| 45               | ND344            | No near neighbour (NC053)              | 57          | 13   | 8   | 3                        | 5    | 5   | 0.004                           |          | 0.005   |                                 |          |         |
| 46               | ND288            | No near neighbour (NC053)              | 57          | 13   | 0   | 3.5                      | 5    | 5   | 0.003                           |          | 0.0008  |                                 |          |         |
| 47               | ND059            | No near neighbour (NC053)              | 64          | 33   | 25  | 3                        | 5    | 5   | 0.01                            |          | 0.05    |                                 |          |         |
| 48               | ND317            | No near neighbour (NC053)              | 79          | 60   | 75  | 2                        | 3    | 3.5 | 0.03                            |          | 0.03    | 0.02                            |          | 0.006   |
| 49               | ND257            | <i>Porphyromonas uenonis</i> 99%       | 50          | 13   | 17  | 4                        | 5    | 5   | 0.02                            |          |         |                                 |          |         |
| 50               | ND315            | <i>Porphyromonas uenonis</i> 97.5%     | 43          | 13   | 25  | 5                        | 5    | 5   |                                 |          |         |                                 |          | 0.02    |
| 51               | ND297            | <i>Porphyromonas uenonis</i> 99%       | 71          | 27   | 33  | 3                        | 5    | 5   | 0.005                           |          | 0.02    |                                 |          |         |
| 52               | ND069            | <i>Prevotella bivia</i> 100%           | 29          | 27   | 8   | 5                        | 5    | 5   |                                 |          |         |                                 |          |         |
| 53               | ND023            | <i>Prevotella amnii</i> 100%           | 71          | 53   | 17  | 2                        | 4    | 5   | 0.0003                          |          | 0.0002  | 0.04                            |          |         |
| 54               | ND429            | <i>Prevotella melaninogenica</i> 98.6% | 50          | 27   | 50  | 4.5                      | 5    | 4.5 |                                 |          |         |                                 |          |         |
| 55               | ND313            | <i>Prevotella timonensis</i> 98%       | 79          | 60   | 58  | 3                        | 3    | 3   |                                 |          | 0.04    |                                 |          |         |
| 56               | ND103            | <i>Prevotella timonensis</i> 97%       | 50          | 27   | 25  | 4.5                      | 5    | 5   |                                 |          |         |                                 |          |         |
| 57               | ND305            | <i>Prevotella timonensis</i> 98.5%     | 64          | 40   | 67  | 4                        | 5    | 3.5 |                                 |          |         |                                 |          |         |
| 58               | ND426            | <i>Prevotella timonensis</i> 99.5%     | 57          | 73   | 42  | 4                        | 3    | 5   |                                 |          |         | 0.02                            |          |         |
| 59               | ND150            | No near neighbour (NC115)              | 64          | 27   | 25  | 3                        | 5    | 5   | 0.004                           |          | 0.003   |                                 |          | 0.02    |
| 60               | ND256            | <i>Prevotella buccalis</i> 96.5%       | 36          | 20   | 17  | 5                        | 5    | 5   |                                 |          |         |                                 |          |         |
| 61               | ND182            | <i>Prevotella buccalis</i> 96%         | 36          | 20   | 17  | 5                        | 5    | 5   |                                 |          |         | 0.04                            |          |         |
| 62               | ND420            | <i>Prevotella buccalis</i> 88%         | 57          | 20   | 42  | 4                        | 5    | 5   | 0.01                            |          |         |                                 |          |         |

Table S5: Distribution of operational taxonomic units by molecular BV status and significance testing

| Row <sup>1</sup> | OTU <sup>2</sup> | Nearest neighbour <sup>3</sup>          | % colonized |      |     | Median Tier <sup>4</sup> |      |     | Significance 1 (p) <sup>5</sup> |          |         | Significance 2 (p) <sup>6</sup> |          |         |
|------------------|------------------|-----------------------------------------|-------------|------|-----|--------------------------|------|-----|---------------------------------|----------|---------|---------------------------------|----------|---------|
|                  |                  |                                         | BV+         | mBVI | BV- | BV+                      | mBVI | BV- | BV+/mBVI                        | BV-/mBVI | BV+/BV- | BV+/mBVI                        | BV-/mBVI | BV+/BV- |
| 63               | ND406            | <i>Atopobium vaginae</i> 96.5%          | 43          | 27   | 0   | 5                        | 5    | 5   |                                 |          | 0.002   |                                 |          |         |
| 64               | ND106            | <i>Atopobium vaginae</i> 97%            | 64          | 33   | 17  | 2.5                      | 5    | 5   |                                 |          | 0.002   |                                 |          |         |
| 65               | ND010            | <i>Atopobium vaginae</i> 96.5%          | 43          | 27   | 33  | 5                        | 5    | 5   |                                 |          |         |                                 |          |         |
| 66               | ND484            | <i>Coryne. tuberculostearicum</i> 99.5% | 14          | 47   | 67  | 5                        | 5    | 3   |                                 |          | 0.002   |                                 |          |         |
| 67               | ND739            | No near neighbour <85%                  | 43          | 20   | 0   | 5                        | 5    | 5   |                                 | 0.03     | 0.01    |                                 |          |         |
| 68               | ND298            | <i>Gardnerella vaginalis</i> 100%       | 57          | 20   | 8   | 4                        | 5    | 5   |                                 |          | 0.007   |                                 |          |         |
| 69               | ND231            | <i>Gardnerella vaginalis</i> 100%       | 64          | 60   | 50  | 3                        | 4    | 4   |                                 |          |         |                                 |          | 0.003   |
| 70               | ND233            | <i>Gardnerella vaginalis</i> 98%        | 50          | 33   | 25  | 4.5                      | 5    | 5   |                                 |          |         | 0.008                           |          |         |
| 71               | ND302            | <i>Gardnerella vaginalis</i> 97.5%      | 43          | 47   | 33  | 5                        | 5    | 5   |                                 |          |         |                                 | 0.02     |         |
| 72               | ND067            | <i>Gardnerella vaginalis</i> 97.5%      | 64          | 20   | 8   | 4                        | 5    | 5   | 0.02                            |          | 0.004   |                                 |          |         |
| 73               | ND316            | <i>Gardnerella vaginalis</i> 97%        | 93          | 73   | 83  | 3                        | 2    | 3   |                                 |          |         | 0.05                            | 0.03     |         |
| 74               | ND285            | <i>Gardnerella vaginalis</i> 98%        | 36          | 53   | 42  | 5                        | 4    | 5   |                                 |          |         |                                 |          |         |
| 75               | ND404            | <i>Gardnerella vaginalis</i> 98%        | 71          | 33   | 67  | 3                        | 5    | 3   |                                 |          |         |                                 |          |         |
| 76               | ND260            | <i>Gardnerella vaginalis</i> 96.5%      | 43          | 53   | 33  | 5                        | 3    | 5   |                                 |          |         |                                 | 0.01     | 0.02    |
| 77               | ND102            | No near neighbour (NC070)               | 29          | 27   | 33  | 5                        | 5    | 5   |                                 |          |         |                                 |          |         |
| 78               | ND301            | No near neighbour (N72)                 | 43          | 27   | 0   | 5                        | 5    | 5   |                                 |          | 0.005   |                                 |          |         |
| 79               | ND304            | <i>Gardnerella vaginalis</i> 88.9%      | 50          | 27   | 8   | 4.5                      | 5    | 5   |                                 |          | 0.006   |                                 |          |         |
| 80               | ND394            | <i>Gardnerella vaginalis</i> 88.9%      | 43          | 40   | 0   | 5                        | 5    | 5   |                                 | 0.01     | 0.005   |                                 |          |         |
| 81               | ND252            | <i>Gardnerella vaginalis</i> 88.9%      | 93          | 87   | 75  | 2                        | 3    | 3   |                                 |          | 0.008   |                                 | 0.02     |         |
| 82               | ND042            | <i>Gardnerella vaginalis</i> 89.1%      | 36          | 20   | 50  | 5                        | 5    | 4.5 |                                 | 0.03     |         |                                 |          |         |
| 83               | ND061            | <i>Gardnerella vaginalis</i> 86.5%      | 29          | 27   | 25  | 5                        | 5    | 5   |                                 |          |         |                                 |          |         |
| 84               | ND054            | <i>Gardnerella vaginalis</i> 90.9%      | 36          | 27   | 42  | 5                        | 5    | 5   |                                 |          |         |                                 |          |         |
| 85               | ND436            | <i>Gardnerella vaginalis</i> 87.5%      | 71          | 27   | 33  | 4                        | 5    | 5   |                                 |          |         | 0.001                           |          |         |
| 86               | ND412            | <i>Gardnerella vaginalis</i> 88.9%      | 43          | 27   | 17  | 5                        | 5    | 5   |                                 |          |         |                                 |          |         |
| 87               | ND328            | <i>Gardnerella vaginalis</i> 90%        | 29          | 47   | 17  | 5                        | 5    | 5   |                                 |          |         |                                 |          |         |
| 88               | ND263            | <i>Gardnerella vaginalis</i> 90%        | 100         | 93   | 75  | 2.5                      | 2    | 3.5 |                                 | 0.01     | 0.005   |                                 | 0.03     | 0.04    |
| 89               | ND393            | <i>Gardnerella vaginalis</i> 87%        | 57          | 47   | 50  | 4                        | 5    | 4   |                                 |          |         |                                 |          |         |
| 90               | ND254            | <i>Gardnerella vaginalis</i> 90.2%      | 86          | 40   | 33  | 3.5                      | 5    | 5   |                                 |          | 0.05    |                                 |          |         |

<sup>1</sup> Row (from left to right) in Fig. 3; <sup>2</sup> OTU: Operational taxonomic unit, ND: Nairobi deep sequencing OTU; <sup>3</sup> Nearest neighbour in cpnDB; <sup>4</sup> Median tier of abundance observed in each group (1=>1%, 2=0.1-0.99%, 3=0.01-0.099%, 4=0.001-0.0099%, 5=undetected); <sup>5</sup> Non-parametric test conducted in R, shaded cells indicate p value <0.05 after Bonferroni correction (p\*90 tests), <sup>6</sup> Non-parametric test conducted in Genespring, no p value <0.05 after correction for multiple comparisons, shaded cell indicates significance by both methods.

Table S6: K-means clustering of operational taxonomic units

| Cluster | OTU <sup>1</sup> | Nearest neighbour <sup>2</sup>     | Group with highest abundance |
|---------|------------------|------------------------------------|------------------------------|
| 0       | ND042            | <i>Gardnerella vaginalis</i> 89.1% | BV+                          |
| 0       | ND260            | <i>Gardnerella vaginalis</i> 96.5% | BV+                          |
| 0       | ND231            | <i>Gardnerella vaginalis</i> 100%  | BV+                          |
| 0       | ND420            | <i>Prevotella buccalis</i> 88%     | BV+                          |
| 0       | ND150            | No near neighbour (NC115)          | BV+                          |
| 0       | ND426            | <i>Prevotella timonensis</i> 99.5% | BV+                          |
| 0       | ND103            | <i>Prevotella timonensis</i> 97%   | BV+                          |
| 0       | ND023            | <i>Prevotella amnii</i> 100%       | BV+                          |
| 0       | ND297            | <i>Porphyromonas uenonis</i> 99%   | BV+                          |
| 0       | ND317            | No near neighbour (NC053)          | BV+                          |
| 0       | ND059            | No near neighbour (NC053)          | BV+                          |
| 0       | ND175            | <i>Megasphaera sp.</i> 99.6%       | BV+                          |
| 1       | ND394            | <i>Gardnerella vaginalis</i> 88.9% | BV+                          |
| 1       | ND106            | <i>Atopobium vaginae</i> 97%       | BV+                          |
| 1       | ND182            | <i>Prevotella buccalis</i> 96%     | BV+                          |
| 1       | ND315            | <i>Porphyromonas uenonis</i> 97.5% | BV+                          |
| 1       | ND288            | No near neighbour (NC053)          | BV+                          |
| 1       | ND344            | No near neighbour (NC053)          | BV+                          |
| 1       | ND286            | No near neighbour (NC053)          | BV+                          |
| 1       | ND318            | <i>Megasphaera sp.</i> 99.5%       | BV+                          |
| 1       | ND237            | No near neighbour (NC040)          | BV+                          |
| 1       | ND360            | <i>Megasphaera sp.</i> 99.5%       | BV+                          |
| 1       | ND291            | No near neighbour (NC039)          | BV+                          |
| 1       | ND398            | No near neighbour (NC039)          | BV+                          |
| 1       | ND089            | No near neighbour (NC039)          | BV+                          |
| 1       | ND348            | <i>Escherichia coli</i> 100%       | BV+                          |
| 2       | ND254            | <i>Gardnerella vaginalis</i> 90.2% | mBVI                         |
| 2       | ND393            | <i>Gardnerella vaginalis</i> 87%   | mBVI                         |
| 2       | ND263            | <i>Gardnerella vaginalis</i> 90%   | mBVI                         |
| 2       | ND328            | <i>Gardnerella vaginalis</i> 90%   | mBVI                         |
| 2       | ND054            | <i>Gardnerella vaginalis</i> 90.9% | mBVI                         |
| 2       | ND304            | <i>Gardnerella vaginalis</i> 88.9% | mBVI                         |
| 2       | ND285            | <i>Gardnerella vaginalis</i> 98%   | mBVI                         |
| 2       | ND316            | <i>Gardnerella vaginalis</i> 97%   | mBVI                         |
| 2       | ND302            | <i>Gardnerella vaginalis</i> 97.5% | mBVI                         |
| 2       | ND233            | <i>Gardnerella vaginalis</i> 98%   | mBVI                         |

Table S6: K-means clustering of operational taxonomic units

| Cluster | OTU <sup>1</sup> | Nearest neighbour <sup>2</sup>                  | Group with highest abundance |
|---------|------------------|-------------------------------------------------|------------------------------|
| 2       | ND406            | <i>Atopobium vaginae</i> 96.5%                  | mBVI                         |
| 2       | ND256            | <i>Prevotella buccalis</i> 96.5%                | mBVI                         |
| 2       | ND305            | <i>Prevotella timonensis</i> 98.5%              | mBVI                         |
| 2       | ND313            | <i>Prevotella timonensis</i> 98%                | mBVI                         |
| 2       | ND069            | <i>Prevotella bivia</i> 100%                    | mBVI                         |
| 2       | ND257            | <i>Porphyromonas uenonis</i> 99%                | mBVI                         |
| 2       | ND084            | <i>Megasphaera sp.</i> 99.5%                    | mBVI                         |
| 2       | ND375            | No near neighbour (NC040)                       | mBVI                         |
| 2       | ND032            | No near neighbour (NC039)                       | mBVI                         |
| 2       | ND765            | <i>Comamonas terrigena</i> 91%                  | mBVI                         |
| 3       | ND436            | <i>Gardnerella vaginalis</i> 87.5%              | mBVI                         |
| 3       | ND061            | <i>Gardnerella vaginalis</i> 86.5%              | mBVI                         |
| 3       | ND252            | <i>Gardnerella vaginalis</i> 88.9%              | mBVI                         |
| 3       | ND102            | No near neighbour (NC070)                       | mBVI                         |
| 3       | ND298            | <i>Gardnerella vaginalis</i> 100%               | mBVI                         |
| 3       | ND010            | <i>Atopobium vaginae</i> 96.5%                  | mBVI                         |
| 3       | ND429            | <i>Prevotella melaninogenica</i> 98.6%          | mBVI                         |
| 4       | ND301            | No near neighbour (N72)                         | BV-                          |
| 4       | ND404            | <i>Gardnerella vaginalis</i> 98%                | BV-                          |
| 4       | ND484            | <i>Corynebacterium tuberculostearicum</i> 99.5% | BV-                          |
| 4       | ND435            | No near neighbour (NC040)                       | BV-                          |
| 4       | ND044            | No near neighbour (NC040)                       | BV-                          |
| 4       | ND303            | <i>Lactobacillus sp. N6</i> 98.9%               | BV-                          |
| 4       | ND255            | <i>Lactobacillus iners</i> 98.9%                | BV-                          |
| 4       | ND246            | <i>Lactobacillus iners</i> 98.5%                | BV-                          |
| 4       | ND284            | <i>Lactobacillus iners</i> 98.2%                | BV-                          |
| 4       | ND877            | <i>Lactobacillus iners</i> 98.9%                | BV-                          |
| 4       | ND019            | <i>Lactobacillus iners</i> 99%                  | BV-                          |
| 4       | ND295            | <i>Lactobacillus iners</i> 98.2%                | BV-                          |
| 4       | ND294            | <i>Lactobacillus iners</i> 99%                  | BV-                          |
| 4       | ND085            | <i>Lactobacillus iners</i> 99%                  | BV-                          |
| 4       | ND038            | <i>Sphingobium japonicum</i> 89.5%              | BV-                          |
| 4       | ND857            | <i>Sphingomonas wittichii</i> 92.5%             | BV-                          |
| 4       | ND658            | <i>Sphingomonas wittichii</i> 89.5%             | BV-                          |
| 4       | ND389            | <i>Sphingomonas wittichii</i> 92.5%             | BV-                          |
| 4       | ND614            | <i>Rhodopseudomonas palustris</i> 92.5%         | BV-                          |

Table S6: K-means clustering of operational taxonomic units

| Cluster | OTU <sup>1</sup> | Nearest neighbour <sup>2</sup>              | Group with highest abundance |
|---------|------------------|---------------------------------------------|------------------------------|
| 4       | ND559            | <i>Mesorhizobium opportunistum</i> 87.5%    | BV-                          |
| 4       | ND057            | <i>Methylobacterium radiotolerans</i> 98.5% | BV-                          |
| 4       | ND308            | No near neighbour <85%                      | BV-                          |
| 4       | ND253            | <i>Variovorax paradoxus</i> 98%             | BV-                          |
| 4       | ND326            | <i>Variovorax paradoxus</i> 98%             | BV-                          |
| 4       | ND670            | <i>Variovorax paradoxus</i> 98%             | BV-                          |
| 4       | ND251            | <i>Bradyrhizobium japonicum</i> 90%         | BV-                          |
| 4       | ND427            | <i>Comamonas terrigena</i> 88%              | BV-                          |
| 4       | ND713            | No near neighbour <85%                      | BV-                          |
| 5       | ND412            | <i>Gardnerella vaginalis</i> 88.9%          | BV-                          |
| 5       | ND067            | <i>Gardnerella vaginalis</i> 97.5%          | BV-                          |
| 5       | ND739            | No near neighbour <85%                      | BV-                          |
| 5       | ND278            | No near neighbour (NC039)                   | BV-                          |
| 5       | ND307            | <i>Lactobacillus sp. N6</i> 100%            | BV-                          |
| 5       | ND320            | <i>Lactobacillus crispatus</i> 100%         | BV-                          |
| 5       | ND296            | <i>Lactobacillus crispatus</i> 100%         | BV-                          |
| 5       | ND439            | <i>Lactobacillus jensenii</i> 100%          | BV-                          |
| 5       | ND401            | <i>Lactobacillus jensenii</i> 95%           | BV-                          |

<sup>1</sup> OTU: Operational taxonomic unit, ND: Nairobi deep sequencing OTU; <sup>2</sup> Nearest neighbour in cpnDB

Table S7: Tagged deep sequencing primers for multiplex GS-FLX

| Primer     | emPCR primer <sup>1</sup> | Tag    | <i>cpn60</i> UT primer      |
|------------|---------------------------|--------|-----------------------------|
| P279gatg:  | GCCTCCCTCGCGCCATCAG       | AGATGC | GAIIIIGCIGGIGAYGGIACIACIAC  |
| P279gctg:  | GCCTCCCTCGCGCCATCAG       | AGCTGC | GAIIIIGCIGGIGAYGGIACIACIAC  |
| P279gtga:  | GCCTCCCTCGCGCCATCAG       | AGTGAC | GAIIIIGCIGGIGAYGGIACIACIAC  |
| P279ctct:  | GCCTCCCTCGCGCCATCAG       | ACTCTC | GAIIIIGCIGGIGAYGGIACIACIAC  |
| P279ctga:  | GCCTCCCTCGCGCCATCAG       | ACTGAC | GAIIIIGCIGGIGAYGGIACIACIAC  |
| P279caga:  | GCCTCCCTCGCGCCATCAG       | ACAGAC | GAIIIIGCIGGIGAYGGIACIACIAC  |
| P279tctg:  | GCCTCCCTCGCGCCATCAG       | ATCTGC | GAIIIIGCIGGIGAYGGIACIACIAC  |
| P279tgag:  | GCCTCCCTCGCGCCATCAG       | ATGAGC | GAIIIIGCIGGIGAYGGIACIACIAC  |
| P279tgca:  | GCCTCCCTCGCGCCATCAG       | ATGCAC | GAIIIIGCIGGIGAYGGIACIACIAC  |
| P279tagt:  | GCCTCCCTCGCGCCATCAG       | ATAGTC | GAIIIIGCIGGIGAYGGIACIACIAC  |
| P279caca:  | GCCTCCCTCGCGCCATCAG       | ACACAC | GAIIIIGCIGGIGAYGGIACIACIAC  |
| P279gaga:  | GCCTCCCTCGCGCCATCAG       | AGAGAC | GAIIIIGCIGGIGAYGGIACIACIAC  |
| P279gtgt:  | GCCTCCCTCGCGCCATCAG       | AGTGTC | GAIIIIGCIGGIGAYGGIACIACIAC  |
| P279gaca:  | GCCTCCCTCGCGCCATCAG       | AGACAC | GAIIIIGCIGGIGAYGGIACIACIAC  |
| P279gtct:  | GCCTCCCTCGCGCCATCAG       | AGTCTC | GAIIIIGCIGGIGAYGGIACIACIAC  |
| P279tcta:  | GCCTCCCTCGCGCCATCAG       | ATCTAC | GAIIIIGCIGGIGAYGGIACIACIAC  |
| P280:      | GCCTTGCCAGCCCGCTCAG       | -----  | YKIYKITCICCRAAICCIGGIGCYTT  |
| P1612gatg: | GCCTCCCTCGCGCCATCAG       | AGATGC | GAIIIIGCIGGYGACGGYACSAACSAC |
| P1612gctg: | GCCTCCCTCGCGCCATCAG       | AGCTGC | GAIIIIGCIGGYGACGGYACSAACSAC |
| P1612gtga: | GCCTCCCTCGCGCCATCAG       | AGTGAC | GAIIIIGCIGGYGACGGYACSAACSAC |
| P1612ctct: | GCCTCCCTCGCGCCATCAG       | ACTCTC | GAIIIIGCIGGYGACGGYACSAACSAC |
| P1612ctga: | GCCTCCCTCGCGCCATCAG       | ACTGAC | GAIIIIGCIGGYGACGGYACSAACSAC |
| P1612caga: | GCCTCCCTCGCGCCATCAG       | ACAGAC | GAIIIIGCIGGYGACGGYACSAACSAC |
| P1612tctg: | GCCTCCCTCGCGCCATCAG       | ATCTGC | GAIIIIGCIGGYGACGGYACSAACSAC |
| P1612tgag: | GCCTCCCTCGCGCCATCAG       | ATGAGC | GAIIIIGCIGGYGACGGYACSAACSAC |
| P1612tgca: | GCCTCCCTCGCGCCATCAG       | ATGCAC | GAIIIIGCIGGYGACGGYACSAACSAC |
| P1612tagt: | GCCTCCCTCGCGCCATCAG       | ATAGTC | GAIIIIGCIGGYGACGGYACSAACSAC |
| P1612caca: | GCCTCCCTCGCGCCATCAG       | ACACAC | GAIIIIGCIGGYGACGGYACSAACSAC |
| P1612gaga: | GCCTCCCTCGCGCCATCAG       | AGAGAC | GAIIIIGCIGGYGACGGYACSAACSAC |
| P1612gtgt: | GCCTCCCTCGCGCCATCAG       | AGTGTC | GAIIIIGCIGGYGACGGYACSAACSAC |
| P1612gaca: | GCCTCCCTCGCGCCATCAG       | AGACAC | GAIIIIGCIGGYGACGGYACSAACSAC |
| P1612gtct: | GCCTCCCTCGCGCCATCAG       | AGTCTC | GAIIIIGCIGGYGACGGYACSAACSAC |
| P1612tcta: | GCCTCCCTCGCGCCATCAG       | ATCTAC | GAIIIIGCIGGYGACGGYACSAACSAC |
| P1613:     | GCCTTGCCAGCCCGCTCAG       | -----  | CGRCGRTRCCGAAGCCSGGIGCCTT   |

<sup>1</sup> emPCR primer: Sequence on left is primer for emulsion PCR, sequence in center is tag unique to each sample, and sequence on right is *cpn60* UT-specific.
